# Supplementary material for: Bacterial contribution to genesis of the novel germ line determinant oskar
Source: eLife journal article supplement (doi:10.7554/elife.45539), 2020-02-24
Supplement: supp [file elife_poa_e45539_Figure_2_figure_supplement_5.pdf › elife_poa_e45539_Figure_2_figure_supplement_5.pdf]

★ *Putative HGT*

**Constraint**

**a** *Unconstrained tree*

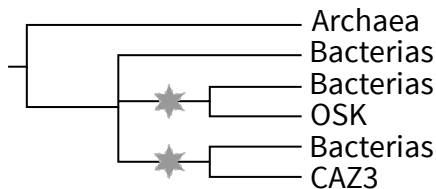

VS

*Constrained by domain of life*

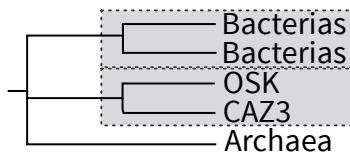

**P-value = 0.002**

**b** *Unconstrained tree*

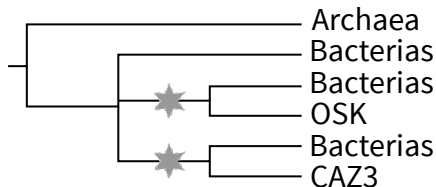

VS

*Monophyletic Eukaryota*

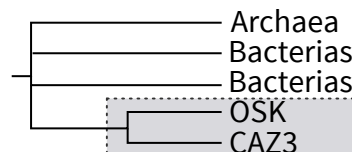

**P-value = 0.009**

**c** *Unconstrained tree*

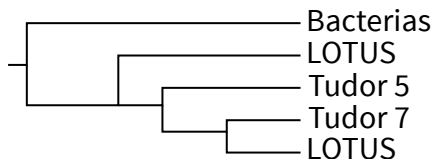

VS

*Monophyletic LOTUS*

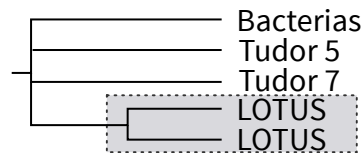

**P-value = 0.037**
