# Supplementary material for: Bacterial contribution to genesis of the novel germ line determinant oskar
Source: eLife journal article supplement (doi:10.7554/elife.45539), 2020-02-24
Supplement: supp [file elife_poa_e45539_Supplementary_file_1.pdf › elife_poa_e45539_Supplementary_file_1.pdf]

## Supplementary File 1 for

### Bacterial contribution to genesis of the novel germ line determinant *oskar* *Leo Blondel, Tamsin E. M. Jones and Cassandra G. Extavour*

The Supplementary Information for this paper consists of the following elements:

#### Supplementary File 1

THIS PDF DOCUMENT: FILE NAME BLONDEL\_JONES\_EXTAVOUR\_HGT\_SUPPLEMENTARY\_FILE\_1

##### 1. Supplementary Tables

- a. Supplementary File 1A: List of genomes and transcriptomes used for automated *oskar* search.
- b. Supplementary File 1B: List of *oskar* sequences used in the final alignment.
- c. Supplementary File 1C: List of sequences used for phylogenetic analysis of the LOTUS domain.
- d. Supplementary File 1D: List of sequences used for phylogenetic analysis of the OSK domain.
- e. Supplementary File 1E: List of genomes analyzed for codon use.

#### Source Data 1

ZIPPED FOLDER: DOWNLOAD HERE

[https://www.dropbox.com/sh/zqf6kpo0kzav7xp/AAC5WPVm9lrDrZHqZg\\_RlsiTa?dl=0](https://www.dropbox.com/sh/zqf6kpo0kzav7xp/AAC5WPVm9lrDrZHqZg_RlsiTa?dl=0)

1. Subfolder **Alignments**: All sequences identified and analyzed in this study, in FASTA format and with corresponding Alignments
2. Subfolder **BLAST search results**: Results of BLASTP searches with full length Oskar, OSK or LOTUS domains as queries
3. Subfolder **Data**: Necessary files for running the different IPython notebooks:
  - a. Subfolder **HMM**: HMM models used for iterative searching for sequences similar to full-length Oskar, LOTUS and OSK domains
  - b. Subfolder **Taxonomy**: Conversion table for UniProt ID to taxon information. (uniprot\_ID\_taxa.tsv)
  - c. Subfolder **Trees**: Contains the tree files obtained from
    - i. RaxML phylogenetic analyses of the OSK and LOTUS domains aligned with MUSCLE, T-Coffee or PRANK
    - ii. MrBayes phylogenetic analyses of the OSK and LOTUS domains aligned with MUSCLE
    - iii. SOWHAT analyses.

#### Scripts

All scripts used herein are hosted on GitHub at [https://github.com/extavourlab/Oskar\\_HGT](https://github.com/extavourlab/Oskar_HGT)

44  
45  
46  
47  
48  
49  
50  
51

**Supplementary File 1A: List of genomes and transcriptomes used for automated *oskar* search.**

List of genomes and transcriptomes that were downloaded, annotated, and searched for *oskar* sequences (see “Hidden Markov Model (HMM) generation and alignments of the *OSK* and *LOTUS* domains” in Methods). The table reports the database provenance (NCBI genome or TSA, or 1KITE database) and the accession number. The TSA accession ID can be searched using the NCBI TSA browser here: <https://www.ncbi.nlm.nih.gov/Traces/wgs/?view=TSA>.

| Type   | Accession ID    | Organism Name                                 |
|--------|-----------------|-----------------------------------------------|
| Genome | GCA_000001765.2 | <i>Drosophila pseudoobscura pseudoobscura</i> |
| Genome | GCA_000002325.2 | <i>Nasonia vitripennis</i>                    |
| Genome | GCA_000002335.2 | <i>Tribolium castaneum</i>                    |
| Genome | GCA_000004775.1 | <i>Nasonia giraulti</i>                       |
| Genome | GCA_000004795.1 | <i>Nasonia longicornis</i>                    |
| Genome | GCA_000005115.1 | <i>Drosophila ananassae</i>                   |
| Genome | GCA_000005135.1 | <i>Drosophila erecta</i>                      |
| Genome | GCA_000005195.1 | <i>Drosophila persimilis</i>                  |
| Genome | GCA_000005245.1 | <i>Drosophila virilis</i>                     |
| Genome | GCA_000005925.1 | <i>Drosophila willistoni</i>                  |
| Genome | GCA_000005975.1 | <i>Drosophila yakuba</i>                      |
| Genome | GCA_000006295.1 | <i>Pediculus humanus corporis</i>             |
| Genome | GCA_000143395.2 | <i>Atta cephalotes</i>                        |
| Genome | GCA_000147175.1 | <i>Camponotus floridanus</i>                  |
| Genome | GCA_000147195.1 | <i>Harpegnathos saltator</i>                  |
| Genome | GCA_000149185.1 | <i>Mayetiola destructor</i>                   |
| Genome | GCA_000151625.1 | <i>Bombyx mori</i>                            |
| Genome | GCA_000151715.1 | <i>Bombyx mori</i>                            |
| Genome | GCA_000181055.3 | <i>Rhodnius prolixus</i>                      |
| Genome | GCA_000184785.1 | <i>Apis florea</i>                            |
| Genome | GCA_000187875.1 | <i>Daphnia pulex</i>                          |
| Genome | GCA_000187915.1 | <i>Pogonomyrmex barbatus</i>                  |
| Genome | GCA_000188075.1 | <i>Solenopsis invicta</i>                     |
| Genome | GCA_000209185.1 | <i>Culex quinquefasciatus</i>                 |
| Genome | GCA_000211455.3 | <i>Anopheles darlingi</i>                     |
| Genome | GCA_000214255.1 | <i>Bombus terrestris</i>                      |
| Genome | GCA_000217595.1 | <i>Linepithema humile</i>                     |
| Genome | GCA_000220665.2 | <i>Drosophila ficusphila</i>                  |
| Genome | GCA_000220905.1 | <i>Megachile rotundata</i>                    |
| Genome | GCA_000224215.2 | <i>Drosophila kikkawai</i>                    |
| Genome | GCA_000224235.2 | <i>Drosophila takahashii</i>                  |
| Genome | GCA_000233415.2 | <i>Drosophila biarmipes</i>                   |
| Genome | GCA_000235995.1 | <i>Danaus plexippus plexippus</i>             |
| Genome | GCA_000236305.2 | <i>Drosophila rhopaloa</i>                    |

|        |                 |                                    |
|--------|-----------------|------------------------------------|
| Genome | GCA_000239435.1 | <i>Tetranychus urticae</i>         |
| Genome | GCA_000239455.1 | <i>Strigamia maritima</i>          |
| Genome | GCA_000259055.1 | <i>Drosophila simulans</i>         |
| Genome | GCA_000262585.1 | <i>Manduca sexta</i>               |
| Genome | GCA_000262795.1 | <i>Phlebotomus papatasi</i>        |
| Genome | GCA_000265325.1 | <i>Lutzomyia longipalpis</i>       |
| Genome | GCA_000269505.2 | <i>Drosophila miranda</i>          |
| Genome | GCA_000281935.1 | <i>Mengenilla moldrzyki</i>        |
| Genome | GCA_000298335.1 | <i>Drosophila albomicans</i>       |
| Genome | GCA_000325945.1 | <i>Plutella xylostella</i>         |
| Genome | GCA_000330985.1 | <i>Plutella xylostella</i>         |
| Genome | GCA_000341935.1 | <i>Cephus cinctus</i>              |
| Genome | GCA_000344095.1 | <i>Athalia rosae</i>               |
| Genome | GCA_000347755.1 | <i>Ceratitis capitata</i>          |
| Genome | GCA_000349025.1 | <i>Anopheles minimus</i>           |
| Genome | GCA_000349045.1 | <i>Anopheles stephensi</i>         |
| Genome | GCA_000349065.1 | <i>Anopheles quadriannulatus</i>   |
| Genome | GCA_000349085.1 | <i>Anopheles funestus</i>          |
| Genome | GCA_000349105.1 | <i>Anopheles epiroticus</i>        |
| Genome | GCA_000349145.1 | <i>Anopheles dirus</i>             |
| Genome | GCA_000349165.1 | <i>Anopheles christyi</i>          |
| Genome | GCA_000349185.1 | <i>Anopheles arabiensis</i>        |
| Genome | GCA_000371365.1 | <i>Musca domestica</i>             |
| Genome | GCA_000439205.1 | <i>Anopheles nili</i>              |
| Genome | GCA_000441895.2 | <i>Anopheles sinensis</i>          |
| Genome | GCA_000469605.1 | <i>Apis dorsata</i>                |
| Genome | GCA_000472105.1 | <i>Drosophila suzukii</i>          |
| Genome | GCA_000473185.1 | <i>Anopheles maculatus</i>         |
| Genome | GCA_000473375.1 | <i>Anopheles culicifacies</i>      |
| Genome | GCA_000473445.2 | <i>Anopheles farauti</i>           |
| Genome | GCA_000473505.1 | <i>Anopheles atroparvus</i>        |
| Genome | GCA_000473525.2 | <i>Anopheles melas</i>             |
| Genome | GCA_000473845.2 | <i>Anopheles merus</i>             |
| Genome | GCA_000475195.1 | <i>Diaphorina citri</i>            |
| Genome | GCA_000500325.1 | <i>Leptinotarsa decemlineata</i>   |
| Genome | GCA_000503995.1 | <i>Ceratosolen solmsi marchali</i> |
| Genome | GCA_000507165.1 | <i>Ephemera danica</i>             |
| Genome | GCA_000516895.1 | <i>Locusta migratoria</i>          |
| Genome | GCA_000599845.1 | <i>Trichogramma pretiosum</i>      |
| Genome | GCA_000611835.1 | <i>Ooceraea biroi</i>              |
| Genome | GCA_000648655.1 | <i>Copidosoma floridanum</i>       |
| Genome | GCA_000648675.1 | <i>Cimex lectularius</i>           |

|        |                 |                                      |
|--------|-----------------|--------------------------------------|
| Genome | GCA_000648695.1 | <i>Onthophagus taurus</i>            |
| Genome | GCA_000648945.1 | <i>Limnephilus lunatus</i>           |
| Genome | GCA_000671735.1 | <i>Glossina fuscipes fuscipes</i>    |
| Genome | GCA_000688715.1 | <i>Glossina pallidipes</i>           |
| Genome | GCA_000688735.1 | <i>Glossina austeni</i>              |
| Genome | GCA_000695345.1 | <i>Bactrocera tryoni</i>             |
| Genome | GCA_000695645.1 | <i>Pachypsylla venusta</i>           |
| Genome | GCA_000696155.1 | <i>Zootermopsis nevadensis</i>       |
| Genome | GCA_000696205.1 | <i>Oncopeltus fasciatus</i>          |
| Genome | GCA_000696795.1 | <i>Halyomorpha halys</i>             |
| Genome | GCA_000696855.1 | <i>Homalodisca vitripennis</i>       |
| Genome | GCA_000699065.1 | <i>Lucilia cuprina</i>               |
| Genome | GCA_000762945.1 | <i>Blattella germanica</i>           |
| Genome | GCA_000775305.1 | <i>Belgica antarctica</i>            |
| Genome | GCA_000786065.1 | <i>Piezodorus guildinii</i>          |
| Genome | GCA_000786525.1 | <i>Chironomus tentans</i>            |
| Genome | GCA_000789215.2 | <i>Bactrocera dorsalis</i>           |
| Genome | GCA_000818775.1 | <i>Glossina palpalis gambiensis</i>  |
| Genome | GCA_000836235.1 | <i>Papilio xuthus</i>                |
| Genome | GCA_000934665.1 | <i>Catajapyx aquilonaris</i>         |
| Genome | GCA_000956155.1 | <i>Cotesia vestalis</i>              |
| Genome | GCA_000956235.1 | <i>Wasmannia auropunctata</i>        |
| Genome | GCA_000956255.1 | <i>Anopheles punctulatus</i>         |
| Genome | GCA_000956275.1 | <i>Anopheles koliensis</i>           |
| Genome | GCA_001014415.1 | <i>Phortica variegata</i>            |
| Genome | GCA_001014435.1 | <i>Mayetiola destructor</i>          |
| Genome | GCA_001014445.1 | <i>Scaptodrosophila lebanonensis</i> |
| Genome | GCA_001014505.1 | <i>Chironomus riparius</i>           |
| Genome | GCA_001014625.1 | <i>Bactrocera oleae</i>              |
| Genome | GCA_001014835.1 | <i>Lucilia sericata</i>              |
| Genome | GCA_001014935.1 | <i>Liriomyza trifolii</i>            |
| Genome | GCA_001014945.1 | <i>Clogmia albipunctata</i>          |
| Genome | GCA_001015115.1 | <i>Eutreta diana</i>                 |
| Genome | GCA_001015145.1 | <i>Eristalis dimidiata</i>           |
| Genome | GCA_001015175.1 | <i>Megaselia abdita</i>              |
| Genome | GCA_001015215.1 | <i>Holcocephala fusca</i>            |
| Genome | GCA_001015235.1 | <i>Sphyracephala brevicornis</i>     |
| Genome | GCA_001015335.1 | <i>Stomoxys calcitrans</i>           |
| Genome | GCA_001017275.1 | <i>Calliphora vicina</i>             |
| Genome | GCA_001017455.1 | <i>Neobellieria bullata</i>          |
| Genome | GCA_001017515.1 | <i>Tephritis californica</i>         |
| Genome | GCA_001017525.1 | <i>Teleopsis dalmanni</i>            |

|        |                 |                                               |
|--------|-----------------|-----------------------------------------------|
| Genome | GCA_001017535.1 | <i>Tipula oleracea</i>                        |
| Genome | GCA_001077435.1 | <i>Glossina morsitans morsitans</i>           |
| Genome | GCA_001186385.1 | <i>Diuraphis noxia</i>                        |
| Genome | GCA_001188975.2 | <i>Bactrocera oleae</i>                       |
| Genome | GCA_001272555.1 | <i>Dufourea novaeangliae</i>                  |
| Genome | GCF_000142985.2 | <i>Acyrtosiphon pisum</i>                     |
| Genome | GCF_000208615.1 | <i>Ixodes scapularis</i>                      |
| Genome | GCF_000004015.3 | <i>Aedes aegypti</i>                          |
| TSA    | GBKU            | <i>Trichoplusia ni</i>                        |
| TSA    | GBRL            | <i>Sitodiplosis mosellana</i>                 |
| TSA    | GAAX            | <i>Forficula auricularia</i>                  |
| TSA    | GACV            | <i>Philopotamus ludificatus</i>               |
| TSA    | GADM            | <i>Drosophila malerkotliana malerkotliana</i> |
| TSA    | GAEO            | <i>Pissodes strobi</i>                        |
| TSA    | GAFI            | <i>Dendroctonus frontalis</i>                 |
| TSA    | GAFR            | <i>Polistes canadensis</i>                    |
| TSA    | GAHN            | <i>Drosophila serrata</i>                     |
| TSA    | GAHP            | <i>Ostrinia nubilalis</i>                     |
| TSA    | GAHQ            | <i>Ostrinia scapulalis</i>                    |
| TSA    | GAIW            | <i>Ganaspis sp. G1</i>                        |
| TSA    | GAJA            | <i>Leptopilina boulardi</i>                   |
| TSA    | GAJC            | <i>Leptopilina heterotoma</i>                 |
| TSA    | GAKJ            | <i>Sitodiplosis mosellana</i>                 |
| TSA    | GAMD            | <i>Anopheles aquasalis</i>                    |
| TSA    | GANH            | <i>Microplitis demolitor</i>                  |
| TSA    | GANO            | <i>Corethrella appendiculata</i>              |
| TSA    | GAPE            | <i>Brassicogethes aeneus</i>                  |
| TSA    | GAPT            | <i>Ectopsocus briggsi</i>                     |
| TSA    | GASE            | <i>Prorethra simplex</i>                      |
| TSA    | GASG            | <i>Yponomeuta evonymellus</i>                 |
| TSA    | GASN            | <i>Thermobia domestica</i>                    |
| TSA    | GASO            | <i>Tricholepidion gertschi</i>                |
| TSA    | GASQ            | <i>Tetrix subulata</i>                        |
| TSA    | GASS            | <i>Platycentropus radiatus</i>                |
| TSA    | GAST            | <i>Polyommatus icarus</i>                     |
| TSA    | GASV            | <i>Notostira elongata</i>                     |
| TSA    | GASW            | <i>Mantis religiosa</i>                       |
| TSA    | GASX            | <i>Folsomia candida</i>                       |
| TSA    | GASY            | <i>Dyseriocrania subpurpurella</i>            |
| TSA    | GATA            | <i>Meloe violaceus</i>                        |
| TSA    | GATB            | <i>Metallyticus splendidus</i>                |
| TSA    | GATC            | <i>Nemophora degeerella</i>                   |

|     |      |                                      |
|-----|------|--------------------------------------|
| TSA | GATD | <i>Pogonognathellus sp. AD-2013</i>  |
| TSA | GATG | <i>Corydalis cornutus</i>            |
| TSA | GATH | <i>Bittacus pilicornis</i>           |
| TSA | GATI | <i>Bombylius major</i>               |
| TSA | GATJ | <i>Bibio marci</i>                   |
| TSA | GATU | <i>Baetis sp. AD-2013</i>            |
| TSA | GATV | <i>Perla marginata</i>               |
| TSA | GATW | <i>Aleochara curtula</i>             |
| TSA | GATY | <i>Chrysis viridula</i>              |
| TSA | GATZ | <i>Sminthurus viridis</i>            |
| TSA | GAUE | <i>Anurida maritima</i>              |
| TSA | GAUF | <i>Leuctra sp. AD-2013</i>           |
| TSA | GAUG | <i>Meinertellus cundinamarcensis</i> |
| TSA | GAUH | <i>Panorpa vulgaris</i>              |
| TSA | GAUI | <i>Subilla sp. AD-2014</i>           |
| TSA | GAUM | <i>Machilis hrabei</i>               |
| TSA | GAUN | <i>Cercopis vulnerata</i>            |
| TSA | GAUO | <i>Velia caprai</i>                  |
| TSA | GAUV | <i>Acanthosoma haemorrhoidale</i>    |
| TSA | GAUW | <i>Apachyus charteceus</i>           |
| TSA | GAUX | <i>Ceuthophilus sp. AD-2013</i>      |
| TSA | GAUY | <i>Gyrinus marinus</i>               |
| TSA | GAUZ | <i>Stenobothrus lineatus</i>         |
| TSA | GAVA | <i>Triarthria setipennis</i>         |
| TSA | GAVB | <i>Triodia sylvina</i>               |
| TSA | GAVM | <i>Hydroptila sp. AD-2013</i>        |
| TSA | GAVV | <i>Pseudomallada prasinus</i>        |
| TSA | GAVW | <i>Epiophlebia superstes</i>         |
| TSA | GAVX | <i>Timema cristinae</i>              |
| TSA | GAWC | <i>Aretaon asperrimus</i>            |
| TSA | GAWD | <i>Medauroidea extradentata</i>      |
| TSA | GAWE | <i>Ramulus artemis</i>               |
| TSA | GAWF | <i>Sipyloidea sipyilus</i>           |
| TSA | GAWG | <i>Extatosoma tiaratum</i>           |
| TSA | GAWK | <i>Ceratophyllus gallinae</i>        |
| TSA | GAWM | <i>Culicoides sonorensis</i>         |
| TSA | GAWP | <i>Grylloblatta bifratrilecta</i>    |
| TSA | GAWQ | <i>Okanagana villosa</i>             |
| TSA | GAWR | <i>Menopon gallinae</i>              |
| TSA | GAWS | <i>Periplaneta americana</i>         |
| TSA | GAWT | <i>Empusa pennata</i>                |
| TSA | GAWU | <i>Aposthonia japonica</i>           |

|     |      |                                      |
|-----|------|--------------------------------------|
| TSA | GAWW | <i>Tenthredo koehleri</i>            |
| TSA | GAWX | <i>Trialeurodes vaporariorum</i>     |
| TSA | GAWZ | <i>Gryllotalpa sp. AD-2013</i>       |
| TSA | GAXA | <i>Isonychia bicolor</i>             |
| TSA | GAXB | <i>Tanzaniophasma sp. AD-2013</i>    |
| TSA | GAXC | <i>Thrips palmi</i>                  |
| TSA | GAXE | <i>Acerentomon sp. AD-2013</i>       |
| TSA | GAXF | <i>Planococcus citri</i>             |
| TSA | GAXG | <i>Gynaikothrips ficorum</i>         |
| TSA | GAXH | <i>Parides eurimedes</i>             |
| TSA | GAXI | <i>Tetrodontophora bielanensis</i>   |
| TSA | GAXM | <i>Mischocyttarus flavitarsis</i>    |
| TSA | GAXO | <i>Argochrysis armilla</i>           |
| TSA | GAXS | <i>Pepsis grossa</i>                 |
| TSA | GAXT | <i>Crioscolia alcione</i>            |
| TSA | GAXW | <i>Euroleon nostras</i>              |
| TSA | GAXX | <i>Rhyacophila fasciata</i>          |
| TSA | GAXZ | <i>Trichocera saltator</i>           |
| TSA | GAYA | <i>Zorotypus caudelli</i>            |
| TSA | GAYB | <i>Zygaena fausta</i>                |
| TSA | GAYC | <i>Osmylus fulvicephalus</i>         |
| TSA | GAYD | <i>Blaberus atropos</i>              |
| TSA | GAYE | <i>Frankliniella cephalica</i>       |
| TSA | GAYH | <i>Conwentzia psociformis</i>        |
| TSA | GAYI | <i>Xenophysella greensladeae</i>     |
| TSA | GAYJ | <i>Atelura formicaria</i>            |
| TSA | GAYK | <i>Boreus hyemalis</i>               |
| TSA | GAYL | <i>Cosmioperla kuna</i>              |
| TSA | GAYM | <i>Calopteryx splendens</i>          |
| TSA | GAYN | <i>Campodea augens</i>               |
| TSA | GAYO | <i>Cordulegaster boltonii</i>        |
| TSA | GAYP | <i>Ctenocephalides felis</i>         |
| TSA | GAYQ | <i>Forficula auricularia</i>         |
| TSA | GAYV | <i>Liposcelis bostrychophila</i>     |
| TSA | GAYY | <i>Acanthocasuarina muellerianae</i> |
| TSA | GAYZ | <i>Ranatra linearis</i>              |
| TSA | GAZA | <i>Haploembia palaui</i>             |
| TSA | GAZB | <i>Lepicerus sp. AD-2013</i>         |
| TSA | GAZD | <i>Lipara lucens</i>                 |
| TSA | GAZE | <i>Mastotermes darwiniensis</i>      |
| TSA | GAZF | <i>Essigella californica</i>         |
| TSA | GAZG | <i>Eurylophella sp. AD-2013</i>      |



|       |                 |                                                |
|-------|-----------------|------------------------------------------------|
| TSA   | GAZH            | <i>Inocellia crassicornis</i>                  |
| TSA   | GAZM            | <i>Stylops melittae</i>                        |
| TSA   | GAZN            | <i>Cryptocercus wrighti</i>                    |
| TSA   | GAZQ            | <i>Aretaon asperrimus</i>                      |
| TSA   | GAZT            | <i>Prosarthria teretirostris</i>               |
| TSA   | GBAB            | <i>Musca domestica</i>                         |
| TSA   | GBBP            | <i>Teleopsis dalmanni</i>                      |
| TSA   | GBCX            | <i>Dastarcus helophoroides</i>                 |
| TSA   | GBDM            | <i>Helicoverpa armigera</i>                    |
| TSA   | GBGV            | <i>Polistes metricus</i>                       |
| 1KITE | INSnfrTAJRAAPEI | <i>Machilis hrabei</i>                         |
| 1KITE | INSnfrTAFRAAPEI | <i>Meinertellus cundinamarcensis</i>           |
| 1KITE | INSfrgTAVRAAPEI | <i>Blaberus atropos</i>                        |
| 1KITE | INSfrgTAARAPEI  | <i>Periplaneta americana</i>                   |
| 1KITE | INSyvtCDRAAPEI  | <i>Cryptocercus wrighti</i>                    |
| 1KITE | INSbttTCRAAPEI  | <i>Arrhenodes minutus</i>                      |
| 1KITE | INSnfrTBERAAPEI | <i>Gyrinus marinus</i>                         |
| 1KITE | INSyvtTAJRAAPEI | <i>Lepicerus sp.</i>                           |
| 1KITE | INShauTAYRAAPEI | <i>Meloe violaceus</i>                         |
| 1KITE | INShauTBERAAPEI | <i>Aleochara curtula</i>                       |
| 1KITE | INSbttTIRAAPEI  | <i>Folsomia candida</i>                        |
| 1KITE | INSnfrTAIRAAPEI | <i>Anurida maritima</i>                        |
| 1KITE | INSjdsTAKRAAPEI | <i>Tetrodontophora bielanensis</i>             |
| 1KITE | INShauTAFRAAPEI | <i>Sminthurus viridis/nigromaculatus</i>       |
| 1KITE | INShauTAJRAAPEI | <i>Pogonognathellus longicornis/flavescens</i> |
| 1KITE | INSfrgTALRAAPEI | <i>Apachyus charteceus</i>                     |
| 1KITE | INSjdsTBNRAAPEI | <i>Forficula auricularia</i>                   |
| 1KITE | INSTmbTABRAAPEI | <i>Campodea augens</i>                         |
| 1KITE | INSjdsTANRAAPEI | <i>Occasjapyx japonicus</i>                    |
| 1KITE | INSbusTBKRAAPEI | <i>Bombylius major</i>                         |
| 1KITE | INSyvtTBWRAAPEI | <i>Lipara lucens</i>                           |
| 1KITE | INSnfrTBFRAAPEI | <i>Triarthria setipennis</i>                   |
| 1KITE | INSbusTBCRABPEI | <i>Bibio marci</i>                             |
| 1KITE | INSjdsTBERAAPEI | <i>Trichocera saltator</i>                     |
| 1KITE | INSfrgTAZRAAPEI | <i>Aposthonia japonica</i>                     |
| 1KITE | INSyvtTAHRAAPEI | <i>Haploembia palaui</i>                       |
| 1KITE | INShauTAKRAAPEI | <i>Baetis sp.</i>                              |
| 1KITE | INSyvtTCERAAPEI | <i>Eurylophella sp.</i>                        |
| 1KITE | INSnfrTAKRAAPEI | <i>Ephemera danica</i>                         |
| 1KITE | INSjdsTAGRAAPEI | <i>Isonychia bicolor</i>                       |
| 1KITE | INSfrgTAKRAAPEI | <i>Galloisiana yuasai</i>                      |
| 1KITE | INSnfrTBKRAAPEI | <i>Grylloblatta bifratrilecta</i>              |



|       |                 |                                      |
|-------|-----------------|--------------------------------------|
| 1KITE | INSnfrTANRAAPEI | <i>Cercopis vulnerata</i>            |
| 1KITE | INSnfrTBLRAAPEI | <i>Okanagana villosa</i>             |
| 1KITE | INSfrgTBCRAAPEI | <i>Nilaparvata lugens</i>            |
| 1KITE | INSjdsTARRAAPEI | <i>Xenophysella greensladeae</i>     |
| 1KITE | INSnfrTAPRAAPEI | <i>Acanthosoma haemorrhoidale</i>    |
| 1KITE | INShauTAPRAAPEI | <i>Notostira elongata</i>            |
| 1KITE | INSyvtTANRAAPEI | <i>Ranatra linearis</i>              |
| 1KITE | INSnfrTAORAAPEI | <i>Velia caprai</i>                  |
| 1KITE | INSfrgTAPRAAPEI | <i>Trialeurodes vaporariorum</i>     |
| 1KITE | INSyvtTBHRAAPEI | <i>Essigella californica</i>         |
| 1KITE | INSjdsTAIRAAPEI | <i>Planococcus citri</i>             |
| 1KITE | INSyvtTALRAAPEI | <i>Acanthocasuarina muellerianae</i> |
| 1KITE | INSnfrTAQRAAPEI | <i>Cotesia vestalis</i>              |
| 1KITE | INShauTAQRABPEI | <i>Chrysis viridula</i>              |
| 1KITE | INSjdsTAURAAPEI | <i>Leptopilina clavipes</i>          |
| 1KITE | INSnfrTAARAAPEI | <i>Orussus abietinus</i>             |
| 1KITE | INSfrgTATRAAPEI | <i>Tenthredo koehleri</i>            |
| 1KITE | INSTmbTBPRAAPEI | <i>Mastotermes darwiniensis</i>      |
| 1KITE | INSbusTBMRAAPEI | <i>Prorhinotermes simplex</i>        |
| 1KITE | INShauTABRAAPEI | <i>Nemophora degeerella</i>          |
| 1KITE | INSbusTBDRAAPEI | <i>Dyseriocrania subpurpurella</i>   |
| 1KITE | INSnfrTAVRAAPEI | <i>Triodia sylvina</i>               |
| 1KITE | INShauTBGRAAPEI | <i>Polyommatus icarus</i>            |
| 1KITE | INSjdsTAJRAAPEI | <i>Parides eurimedes</i>             |
| 1KITE | INShauTBFRAAPEI | <i>Yponomeuta evonymellus</i>        |
| 1KITE | INSjdsTAWRAAPEI | <i>Zygaena fausta</i>                |
| 1KITE | INSfrgTASRAAPEI | <i>Empusa pennata</i>                |
| 1KITE | INShauTAARAAPEI | <i>Mantis religiosa</i>              |
| 1KITE | INShauTAMRAAPEI | <i>Metallyticus splendidus</i>       |
| 1KITE | INSfrgTBBRAAPEI | <i>Tanzaniophasma sp.</i>            |
| 1KITE | INSbttTARAPEI   | <i>Bittacus pilicornis</i>           |
| 1KITE | INSTmbTAWRAAPEI | <i>Boreus hyemalis</i>               |
| 1KITE | INShauTACRAAPEI | <i>Panorpa vulgaris</i>              |
| 1KITE | INSbttTKRAAPEI  | <i>Corydalus cornutus</i>            |
| 1KITE | INSnfrTARRAAPEI | <i>Pseudomallada prasinus</i>        |
| 1KITE | INSjdsTBQRAAPEI | <i>Conwentzia psociformis</i>        |
| 1KITE | INSjdsTATRAAPEI | <i>Euroleon nostras</i>              |
| 1KITE | INSjdsTBJRAAPEI | <i>Osmylus fulvicephalus</i>         |
| 1KITE | INSjdsTBHRAAPEI | <i>Cordulegaster boltonii</i>        |
| 1KITE | INSfrgTAHRAAPEI | <i>Epiophlebia superstes</i>         |
| 1KITE | INSTmbTAARAAPEI | <i>Calopteryx splendens</i>          |
| 1KITE | INSnfrTAMRAAPEI | <i>Stenobothrus lineatus</i>         |

|       |                 |                                  |
|-------|-----------------|----------------------------------|
| 1KITE | INSmbTBCRBAPEI  | <i>Prosarthria teretirostris</i> |
| 1KITE | INShauTANRAAPEI | <i>Tetrix subulata</i>           |
| 1KITE | INSfrgTAXRABPEI | <i>Gryllotalpa sp.</i>           |
| 1KITE | INSnfrTBIRAAPEI | <i>Ceuthophilus sp.</i>          |
| 1KITE | INSmbTBERAAPEI  | <i>Aretaon asperrimus</i>        |
| 1KITE | INSfrgTAORAAPEI | <i>Peruphasma schultei</i>       |
| 1KITE | INSnfrTBPRAAPEI | <i>Timema cristinae</i>          |
| 1KITE | INSmbTBFRAAPEI  | <i>Cosmioperla kuna</i>          |
| 1KITE | INSnfrTALRAAPEI | <i>Leuctra sp.</i>               |
| 1KITE | INShauTALRAAPEI | <i>Perla marginata</i>           |
| 1KITE | INSjdsTAHRAAPEI | <i>Acerentomon sp.</i>           |
| 1KITE | INSfrgTAFRAAPEI | <i>Menopon gallinae</i>          |
| 1KITE | INSyvtTCFRAAPEI | <i>Ectopsocus briggsi</i>        |
| 1KITE | INSmbTBGRAAPEI  | <i>Liposcelis bostrychophila</i> |
| 1KITE | INSnfrTAGRAAPEI | <i>Xanthostigma xanthostigma</i> |
| 1KITE | INSnfrTBARAAPEI | <i>Ceratophyllus gallinae</i>    |
| 1KITE | INSmbTAYRAAPEI  | <i>Ctenocephalides felis</i>     |
| 1KITE | INSyvtTBKRAAPEI | <i>Stylops melittae</i>          |
| 1KITE | INSjdsTADRAAPEI | <i>Gynaikothrips ficorum</i>     |
| 1KITE | INSjdsTABRAAPEI | <i>Frankliniella cephalica</i>   |
| 1KITE | INSjdsTACRAAPEI | <i>Thrips palmi</i>              |
| 1KITE | INSnfrTBJRAAPEI | <i>Hydroptila actia/argosa</i>   |
| 1KITE | INSjdsTBSRAAPEI | <i>Rhyacophila fasciata</i>      |
| 1KITE | INSjdsTAQRAAPEI | <i>Zorotypus caudelli</i>        |
| 1KITE | INSjdsTAVRAAPEI | <i>Atelura formicaria</i>        |
| 1KITE | INSbttTJRAAPEI  | <i>Tricholepidion gertschi</i>   |
| 1KITE | INSbttTSRAAPEI  | <i>Thermobia domestica</i>       |

53  
54  
55  
56  
57  
58  
59

**Supplementary File 1B: List of *oskar* sequences used in the final alignment.**

List of accession numbers and database provenance of the sequences used in the final alignments of Oskar analysed herein. The table contains the database provenance (*Type*), the database accession number (*ID*), the species, family and order, and extraction notes. In the “Annotation” Column, P = homolog identified by pipeline; DB = homolog identified by database annotation. \*Sequence recomposed from two transcripts: GBCX01024638.1 and GBCX01024637.

| Type | ID                 | Species                               | Family           | Order       | Annotation | Note    |
|------|--------------------|---------------------------------------|------------------|-------------|------------|---------|
| TSA  | GAWC01068734.1     | <i>Aretaon asperrimus</i>             | Heteropterygidae | Phasmatodea | P          | HMMER   |
| TSA  | GAKJ01010751.1     | <i>Sitodiplosis mosellana</i>         | Cecidomyiidae    | Diptera     | P          | HMMER   |
| TSA  | GATI01010233.1     | <i>Bombylius major</i>                | Bombyliidae      | Diptera     | P          | HMMER   |
| TSA  | GAWW01000144.1     | <i>Tenthredo koehleri</i>             | Tenthredinidae   | Hymenoptera | P          | HMMER   |
| TSA  | GAIW01009539.1     | <i>Ganaspis sp.</i>                   | Figitidae        | Hymenoptera | P          | HMMER   |
| TSA  | GATY01008637.1     | <i>Chrysis viridula</i>               | Chrysididae      | Hymenoptera | P          | HMMER   |
| TSA  | GAXM01030263.1     | <i>Mischocyttarus flavitarsis</i>     | Vespidae         | Hymenoptera | P          | HMMER   |
| TSA  | GAFR01040300.1     | <i>Polistes canadensis</i>            | Vespidae         | Hymenoptera | P          | HMMER   |
| TSA  | GAZD01106195.1     | <i>Lipara lucens</i>                  | Chloropidae      | Diptera     | P          | HMMER   |
| TSA  | GAVA01002196.1     | <i>Triarthria setipennis</i>          | Tachinidae       | Diptera     | P          | HMMER   |
| TSA  | GACV01001831.1     | <i>Philopotamus ludificatus</i>       | Philopotaminae   | Trichoptera | P          | HMMER   |
| TSA  | GAPE01019095.1     | <i>Brassicogethes aeneus</i>          | Nitidulidae      | Coleoptera  | P          | HMMER   |
| TSA  | GBCX01024638.1_7.1 | <i>Dastarcus helophoroides*</i>       | Bothrideridae    | Coleoptera  | P          | BLAST 1 |
| TSA  | GAKJ01010751.1     | <i>Sitodiplosis mosellana</i>         | Cecidomyiidae    | Diptera     | P          | HMMER   |
| TSA  | GAWM01006639.1     | <i>Culicoides sonorensis</i>          | Ceratopogonidae  | Diptera     | P          | HMMER   |
| TSA  | GAMD01000859.1     | <i>Anopheles aquasalis</i>            | Culicidae        | Diptera     | P          | HMMER   |
| TSA  | GBEO01001325.1     | <i>Anopheles sinensis</i>             | Culicidae        | Diptera     | P          | HMMER   |
| TSA  | GAKP01002609.1     | <i>Bactrocera dorsalis</i>            | Tephritidae      | Diptera     | P          | HMMER   |
| TSA  | GAXM01030263.1     | <i>Mischocyttarus flavitarsis</i>     | Vespidae         | Hymenoptera | P          | HMMER   |
| TSA  | GAFR01040300.1     | <i>Polistes canadensis canadensis</i> | Vespidae         | Hymenoptera | P          | HMMER   |
| TSA  | GBGV01010610.1     | <i>Polistes metricus</i>              | Vespidae         | Hymenoptera | P          | HMMER   |
| TSA  | GAIW01011550.1     | <i>Ganaspis sp. G1</i>                | Figitidae        | Hymenoptera | P          | HMMER   |
| TSA  | GAJC01011221.1     | <i>Leptopilina heterotoma</i>         | Figitidae        | Hymenoptera | P          | HMMER   |
| TSA  | GAIW01009539.1     | <i>Ganaspis sp. G1</i>                | Figitidae        | Hymenoptera | P          | HMMER   |

|        |                 |                                      |                  |             |   |          |
|--------|-----------------|--------------------------------------|------------------|-------------|---|----------|
| TSA    | GAJA01020544.1  | <i>Leptopilina boulandi</i>          | Figitidae        | Hymenoptera | P | HMMER    |
| TSA    | GAJC01009625.1  | <i>Leptopilina heterotoma</i>        | Figitidae        | Hymenoptera | P | HMMER    |
| TSA    | GAXO01016630.1  | <i>Argochrysis armilla</i>           | Chrysididae      | Hymenoptera | P | HMMER    |
| TSA    | GAEO01004319.1  | <i>Pissodes strobi</i>               | Curculionidae    | Coleoptera  | P | HMMER    |
| TSA    | GBBP01080309.1  | <i>Teleopsis dalmanni</i>            | Diopsidae        | Diptera     | P | HMMER    |
| TSA    | GAVM01000124.1  | <i>Hydroptila actia/argosa</i>       | Hydroptilidae    | Trichoptera | P | HMMER    |
| TSA    | GAWC01068728    | <i>Aretaon asperrimus</i>            | Heteropterygidae | Phasmatodea | P | HMMER    |
| TSA    | GBEO01001325.1  | <i>Anopheles sinensis</i>            | Culicidae        | Diptera     | P | HMMER    |
| Genome | GCA_000349125.1 | <i>Anopheles albimanus</i>           | Culicidae        | Diptera     | P | Snap     |
| Genome | GCA_000349065.1 | <i>Anopheles quadriannulatus</i>     | Culicidae        | Diptera     | P | Augustus |
| Genome | GCA_000349185.1 | <i>Anopheles arabiensis</i>          | Culicidae        | Diptera     | P | Augustus |
| Genome | GCA_000473845.2 | <i>Anopheles merus</i>               | Culicidae        | Diptera     | P | Augustus |
| Genome | GCA_000473375.1 | <i>Anopheles culicifacies</i>        | Culicidae        | Diptera     | P | Augustus |
| Genome | GCA_000349085.1 | <i>Anopheles funestus</i>            | Culicidae        | Diptera     | P | Augustus |
| Genome | GCA_000209185.1 | <i>Culex quinquefasciatus</i>        | Culicidae        | Diptera     | P | Snap     |
| Genome | GCF_000004015.3 | <i>Aedes aegypti</i>                 | Culicidae        | Diptera     | P | Augustus |
| Genome | GCA_001014445.1 | <i>Scaptodrosophila lebanonensis</i> | Drosophilidae    | Diptera     | P | Snap     |
| Genome | GCA_000005925.1 | <i>Drosophila willistoni</i>         | Drosophilidae    | Diptera     | P | Augustus |
| Genome | GCA_000005115.1 | <i>Drosophila ananassae</i>          | Drosophilidae    | Diptera     | P | Snap     |
| Genome | GCA_000236285.2 | <i>Drosophila bipectinata</i>        | Drosophilidae    | Diptera     | P | Augustus |
| Genome | GCA_000224215.2 | <i>Drosophila kikkawai</i>           | Drosophilidae    | Diptera     | P | Snap     |
| Genome | GCA_000236325.2 | <i>Drosophila eugracilis</i>         | Drosophilidae    | Diptera     | P | Augustus |
| Genome | GCA_000001215.4 | <i>Drosophila melanogaster</i>       | Drosophilidae    | Diptera     | P | Augustus |
| Genome | GCA_000259055.1 | <i>Drosophila simulans</i>           | Drosophilidae    | Diptera     | P | Snap     |
| Genome | GCA_000005215.1 | <i>Drosophila sechellia</i>          | Drosophilidae    | Diptera     | P | Augustus |
| Genome | GCA_000005135.1 | <i>Drosophila erecta</i>             | Drosophilidae    | Diptera     | P | Augustus |
| Genome | GCA_000005975.1 | <i>Drosophila yakuba</i>             | Drosophilidae    | Diptera     | P | Augustus |
| Genome | GCA_000220665.2 | <i>Drosophila ficusphila</i>         | Drosophilidae    | Diptera     | P | Snap     |
| Genome | GCA_000224195.2 | <i>Drosophila elegans</i>            | Drosophilidae    | Diptera     | P | Snap     |
| Genome | GCA_000236305.2 | <i>Drosophila rhopaloa</i>           | Drosophilidae    | Diptera     | P | Augustus |
| Genome | GCA_000233415.2 | <i>Drosophila biarmipes</i>          | Drosophilidae    | Diptera     | P | Snap     |

|            |                    |                                  |                |              |    |          |
|------------|--------------------|----------------------------------|----------------|--------------|----|----------|
| Genome     | GCA_000224235.2    | <i>Drosophila takahashii</i>     | Drosophilidae  | Diptera      | P  | Augustus |
| Genome     | GCA_000269505.2    | <i>Drosophila miranda</i>        | Drosophilidae  | Diptera      | P  | Augustus |
| Genome     | GCA_000001765.2    | <i>Drosophila pseudoobscura</i>  | Drosophilidae  | Diptera      | P  | Snap     |
| Genome     | GCA_000005195.1    | <i>Drosophila persimilis</i>     | Drosophilidae  | Diptera      | P  | Snap     |
| Genome     | GCA_000298335.1    | <i>Drosophila albomicans</i>     | Drosophilidae  | Diptera      | P  | Snap     |
| Genome     | GCA_000005155.1    | <i>Drosophila grimshawi</i>      | Drosophilidae  | Diptera      | P  | Snap     |
| Genome     | GCA_000005175.1    | <i>Drosophila mojavensis</i>     | Drosophilidae  | Diptera      | P  | Snap     |
| Genome     | GCA_000005245.1    | <i>Drosophila virilis</i>        | Drosophilidae  | Diptera      | P  | Snap     |
| Genome     | GCA_000371365.1    | <i>Musca domestica</i>           | Muscidae       | Diptera      | P  | Augustus |
| Genome     | GCA_000648655.1    | <i>Copidosoma floridanum</i>     | Encyrtidae     | Hymenoptera  | P  | Blast    |
| Protein    | ABC54566.1         | <i>Anopheles gambiae</i>         | Culicidae      | Diptera      | DB | -        |
| Protein    | KYN09041           | <i>Trachymyrmex cornetzi</i>     | Formicidae     | Hymenoptera  | DB | -        |
| Protein    | KYM88541           | <i>Atta colombica</i>            | Formicidae     | Hymenoptera  | DB | -        |
| Protein    | XP_012060266       | <i>Atta cephalotes</i>           | Formicidae     | Hymenoptera  | DB | -        |
| Protein    | XP_011057669       | <i>Acromyrmex echinator</i>      | Formicidae     | Hymenoptera  | DB | -        |
| Protein    | ADM07366           | <i>Messor pergandei</i>          | Formicidae     | Hymenoptera  | DB | -        |
| Protein    | XP_008556449       | <i>Microplitis demolitor</i>     | Microgastrinae | Hymenoptera  | DB | -        |
| Protein    | XP_012229836       | <i>Linepithema humile</i>        | Dolichoderinae | Hymenoptera  | DB | -        |
| Protein    | ABC54566           | <i>Anopheles gambiae</i>         | Culicidae      | Diptera      | DB | -        |
| Protein    | ACB20969           | <i>Culex quinquefasciatus</i>    | Culicidae      | Diptera      | DB | -        |
| Protein    | ABC41128           | <i>Aedes aegypti</i>             | Culicidae      | Diptera      | DB | -        |
| Protein    | XP_004529162       | <i>Ceratitis capitata</i>        | Tephritidae    | Diptera      | DB | -        |
| Protein    | NP_001234884       | <i>Nasonia vitripennis</i>       | Pteromalidae   | Hymenoptera  | DB | -        |
| Protein    | XM_011167600       | <i>Solenopsis invicta</i>        | Formicidae     | Hymenoptera  | DB | -        |
| Protein    | JR477371.1         | <i>Rhynchophorus errugineus</i>  | Curculionidae  | Coleoptera   | DB | -        |
| Nucleotide | JO902149           | <i>Aedes albopictus</i>          | Aedes          | Diptera      | DB | -        |
| Nucleotide | JO874052           | <i>Aedes albopictus</i>          | Aedes          | Diptera      | DB | -        |
| Nucleotide | JO885398           | <i>Aedes albopictus</i>          | Aedes          | Diptera      | DB | -        |
| 1KITE      | INSTmbTBGRAAPEI-33 | <i>Liposcelis bostrychophila</i> | Liposcelididae | Psocodea     | P  | Blast    |
| 1KITE      | INSjdsTABRAAPEI-20 | <i>Frankliniella cephalica</i>   | Thripidae      | Thysanoptera | P  | Blast    |
| 1KITE      | INSjdsTACRAAPEI-21 | <i>Thrips palmi</i>              | Thripidae      | Thysanoptera | P  | Blast    |

|       |                    |                                |                 |               |   |       |
|-------|--------------------|--------------------------------|-----------------|---------------|---|-------|
| 1KITE | INShauTABRAAPEI-93 | <i>Nemophora degeerella</i>    | Adelidae        | Lepidoptera   | P | Blast |
| 1KITE | INSbttTARAAPEI-9   | <i>Platycentropus radiatus</i> | Limnephilidae   | Trichoptera   | P | Blast |
| 1KITE | INSnfrTALRAAPEI-31 | <i>Leuctra sp.</i>             | Leuctridae      | Plecoptera    | P | Blast |
| 1KITE | INShauTAKRAAPEI-90 | <i>Baetis pumilus</i>          | Baetidae        | Ephemeroptera | P | Blast |
| 1KITE | INSjdsTADRAAPEI-22 | <i>Gynaikothrips ficorum</i>   | Phlaeothripidae | Thysanoptera  | P | Blast |
| 1KITE | INStmbTAWRAAPEI-13 | <i>Boreus hyemalis</i>         | Boreidae        | Mecoptera     | P | Blast |
| 1KITE | INSyvtCDRAAPEI-35  | <i>Cryptocercus wrighti</i>    | Cryptocercidae  | Blattodea     | P | Blast |
| 1KITE | INSnfrTAQRAAPEI-37 | <i>Cotesia vestalis</i>        | Braconidae      | Hymenoptera   | P | Blast |
| 1KITE | INSjdsTAURAAPEI-62 | <i>Leptopilina clavipes</i>    | Figitidae       | Hymenoptera   | P | Blast |

60

61 **Supplementary File 1C: List of sequences and their BLAST results used for phylogenetic analysis of the LOTUS domain.**

62 The sequences were obtained by searching the TrEMBL database using hmmsearch and the final HMM generated for LOTUS  
 63 (Supplementary files: HMM>LOTUS.hmm). Reported are the UniProtID (*Accession Number*), the Domain and Phylum origin of the  
 64 sequence, the E-value, score and bias given by hmmsearch, and the description of the target from UniProt. To obtain sequences for each  
 65 entry, either search UniProt directly (<https://www.uniprot.org/>) or consult the final alignment in Supplementary Files:  
 66 Alignments>LOTUS\_TREE.fasta. Phylum abbreviations: A = Arthropoda; An = Annelida; E = Echinodermata; F = Firmicutes; M =  
 67 Mollusca; T = Tunicata; V = Vertebrata; ? = unclassified  
 68

| Accession ID     | Domain  | Phylum | E-value  | score | bias | Description of Target                                                                                  |
|------------------|---------|--------|----------|-------|------|--------------------------------------------------------------------------------------------------------|
| V3Z0B0_LOTGI     | Eukarya | M      | 8.30E-32 | 120.8 | 0.1  | Uncharacterized protein OS=Lottia gigantea<br>GN=LOTGIDRAFT_236389 PE=4 SV=1                           |
| R7UJX3_CAPTE     | Eukarya | An     | 4.00E-30 | 115.3 | 0    | Uncharacterized protein OS=Capitella teleta<br>GN=CAPTEDRAFT_218952 PE=4 SV=1                          |
| E9IZ46_SOLIN     | Eukarya | A      | 2.80E-27 | 106.2 | 0.1  | Putative uncharacterized protein (Fragment) OS=Solenopsis<br>invicta GN=SINV_01516 PE=4 SV=1           |
| K7JU22_NASVI     | Eukarya | A      | 9.00E-27 | 104.6 | 0.2  | Uncharacterized protein OS=Nasonia vitripennis GN=oskar<br>PE=4 SV=1                                   |
| F4WQN7_ACREC     | Eukarya | A      | 1.30E-25 | 100.9 | 0.1  | Maternal effect protein oskar OS=Acromyrmex echinator<br>GN=G5I_08127 PE=4 SV=1                        |
| W4ZBK4_STRPU     | Eukarya | E      | 1.70E-25 | 100.5 | 0.1  | Uncharacterized protein OS=Strongylocentrotus purpuratus<br>GN=Sp-Tdrd5 PE=4 SV=1                      |
| E2A7I8_CAMFO     | Eukarya | A      | 1.90E-25 | 100.4 | 2.1  | Putative uncharacterized protein OS=Camponotus floridanus<br>GN=EAG_03874 PE=4 SV=1                    |
| F2WJY6_9HYME     | Eukarya | A      | 3.40E-25 | 99.6  | 0    | Oskar (Fragment) OS=Messor pergandei PE=2 SV=1                                                         |
| B4N816_DROWI     | Eukarya | A      | 8.50E-25 | 98.3  | 9.6  | Uncharacterized protein OS=Drosophila willistoni<br>GN=Dwil\GK11116 PE=4 SV=2                          |
| B4K9E5_DROMO     | Eukarya | A      | 8.70E-25 | 98.2  | 0.6  | Uncharacterized protein OS=Drosophila mojavensis<br>GN=Dmoj\GI10055 PE=4 SV=2                          |
| A0A026WMY1_CERBI | Eukarya | A      | 2.20E-24 | 97    | 0.1  | Maternal effect protein oskar OS=Cerapachys biroi<br>GN=X777_01612 PE=4 SV=1                           |
| C3ZCL9_BRAFL     | Eukarya | A      | 5.40E-24 | 95.7  | 0    | Putative uncharacterized protein OS=Branchiostoma floridae<br>GN=BRAFLDRAFT_64001 PE=4 SV=1            |
| B4LXK5_DROVI     | Eukarya | A      | 8.00E-24 | 95.2  | 0.9  | Oskar OS=Drosophila virilis GN=osk PE=4 SV=1                                                           |
| K4MTL4_GRYBI     | Eukarya | A      | 6.70E-23 | 92.2  | 0    | Oskar OS=Gryllus bimaculatus PE=2 SV=1<br>GH23955 OS=Drosophila grimshawi GN=Dgri\GH23955 PE=4<br>SV=1 |
| B4JTJ1_DROGR     | Eukarya | A      | 8.30E-23 | 91.9  | 1.4  |                                                                                                        |
| A1Y1T7_DROIM     | Eukarya | A      | 8.60E-23 | 91.9  | 0.8  | Oskar OS=Drosophila immigrans GN=osk PE=4 SV=1                                                         |
| Q2PP79_AEDAE     | Eukarya | A      | 1.70E-22 | 90.9  | 0    | Oskar OS=Aedes aegypti PE=4 SV=1                                                                       |



|                  |         |   |          |      |      |                                                                                                     |
|------------------|---------|---|----------|------|------|-----------------------------------------------------------------------------------------------------|
| W8CE30_CERCA     | Eukarya | A | 2.00E-22 | 90.7 | 0.3  | Maternal effect protein oskar OS=Ceratitidis capitata GN=OSKA PE=2 SV=1                             |
| T1PG45_MUSDO     | Eukarya | A | 1.60E-21 | 87.8 | 1.2  | GDSL-like Lipase/Acylhydrolase OS=Musca domestica PE=2 SV=1                                         |
| A0A0L8HW18_OCTBM | Eukarya | M | 1.70E-21 | 87.7 | 7.5  | Uncharacterized protein OS=Octopus bimaculoides GN=OCBIM_22005378mg PE=4 SV=1                       |
| F6QYS5_XENTR     | Eukarya | V | 6.10E-20 | 82.7 | 0.2  | Uncharacterized protein (Fragment) OS=Xenopus tropicalis PE=4 SV=1                                  |
| B0WIV7_CULQU     | Eukarya | A | 8.90E-20 | 82.2 | 0.1  | Oskar OS=Culex quinquefasciatus GN=CpipJ_CPIJ007471 PE=2 SV=1                                       |
| A0A034WRF5_BACDO | Eukarya | A | 1.30E-19 | 81.6 | 13.1 | Maternal effect protein oskar OS=Bactrocera dorsalis GN=OSKA PE=4 SV=1                              |
| Q7PQJ3_ANOGA     | Eukarya | A | 1.40E-19 | 81.5 | 0    | AGAP003545-PA OS=Anopheles gambiae GN=osk PE=4 SV=3                                                 |
| X1WIW2_ACYPI     | Eukarya | A | 1.70E-19 | 81.3 | 12.3 | Uncharacterized protein OS=Acyrtosiphon pisum GN=LOC100162069 PE=4 SV=1                             |
| A0A023EWW9_TRIIF | Eukarya | A | 1.80E-19 | 81.2 | 0.2  | Putative transcriptional coactivator (Fragment) OS=Triatoma infestans PE=2 SV=1                     |
| A0A0L0CP24_LUCCU | Eukarya | A | 2.40E-19 | 80.8 | 0.5  | Uncharacterized protein OS=Lucilia cuprina GN=FF38_12727 PE=4 SV=1                                  |
| A0A0K8W0W3_BACLA | Eukarya | A | 5.00E-19 | 79.8 | 0    | Maternal effect protein oskar OS=Bactrocera latifrons GN=osk_1 PE=4 SV=1                            |
| A0A0A1XRQ4_BACCU | Eukarya | A | 7.20E-19 | 79.3 | 6.4  | Maternal effect protein oskar OS=Bactrocera cucurbitae GN=osk PE=4 SV=1                             |
| A0A088ASD6_APIME | Eukarya | A | 2.90E-18 | 77.3 | 0.2  | Uncharacterized protein OS=Apis mellifera GN=LOC726241 PE=4 SV=1                                    |
| K1QZD2_CRAGI     | Eukarya | M | 1.60E-17 | 75   | 0    | Tudor domain-containing protein 7 OS=Crassostrea gigas GN=CGI_10018436 PE=4 SV=1                    |
| A0A139WGI6_TRICA | Eukarya | A | 1.70E-17 | 74.9 | 0.1  | Tudor domain-containing protein 7-like protein OS=Tribolium castaneum GN=TcasGA2_TC034722 PE=4 SV=1 |
| F6YH90_ORNAN     | Eukarya | V | 1.80E-17 | 74.8 | 0    | Uncharacterized protein OS=Ornithorhynchus anatinus GN=TDRD5 PE=4 SV=1                              |
| W5JJ85_ANODA     | Eukarya | A | 2.10E-17 | 74.6 | 0    | Uncharacterized protein OS=Anopheles darlingi GN=AND_005442 PE=4 SV=1                               |
| A0A084WRU4_ANOSI | Eukarya | A | 2.40E-17 | 74.4 | 0.2  | AGAP003545-PA-like protein OS=Anopheles sinensis GN=ZHAS_00021239 PE=4 SV=1                         |
| H2YLA8_CIOSA     | Eukarya | T | 2.60E-17 | 74.3 | 0.1  | Uncharacterized protein OS=Ciona savignyi GN=Csa.10307 PE=4 SV=1                                    |
| G1KVT0_ANOCA     | Eukarya | V | 2.70E-17 | 74.2 | 0.1  | Uncharacterized protein OS=Anolis carolinensis GN=TDRD5 PE=4 SV=1                                   |
| G3TEV7_LOXAF     | Eukarya | V | 4.50E-17 | 73.5 | 0    | Uncharacterized protein OS=Loxodonta africana GN=TDRD5 PE=4 SV=1                                    |
| A0A0K8TEH4_LYGHE | Eukarya | A | 6.40E-17 | 73   | 0    | Uncharacterized protein OS=Lygus hesperus PE=4 SV=1                                                 |

|                  |         |   |          |      |     |                                                                                      |
|------------------|---------|---|----------|------|-----|--------------------------------------------------------------------------------------|
| A0A067RPA3_ZOONE | Eukarya | A | 7.10E-17 | 72.9 | 0.1 | Tudor domain-containing protein 7 OS=Zootermopsis nevadensis GN=L798_01728 PE=4 SV=1 |
| G3VEY7_SARHA     | Eukarya | V | 1.30E-16 | 72.1 | 0   | Uncharacterized protein OS=Sarcophilus harrisii GN=TDRD5 PE=4 SV=1                   |
| L8I7L7_9CETA     | Eukarya | V | 1.40E-16 | 72   | 0.1 | Tudor domain-containing protein 5 (Fragment) OS=Bos mutus GN=M91_03486 PE=4 SV=1     |
| W5Q779_SHEEP     | Eukarya | V | 1.40E-16 | 71.9 | 0.5 | Uncharacterized protein OS=Ovis aries GN=TDRD5 PE=4 SV=1                             |
| G5E528_BOVIN     | Eukarya | V | 2.30E-16 | 71.3 | 0   | Tudor domain-containing protein 5 OS=Bos taurus GN=TDRD5 PE=4 SV=1                   |
| H2MII4_ORYLA     | Eukarya | V | 2.90E-16 | 71   | 0   | Uncharacterized protein OS=Oryzias latipes GN=TDRD7 (1 to many) PE=4 SV=1            |
| N6TQX5_DENPD     | Eukarya | A | 3.20E-16 | 70.8 | 0.1 | Uncharacterized protein (Fragment) OS=Dendroctonus ponderosae GN=YQE_11709 PE=4 SV=1 |
| F6WY93_HORSE     | Eukarya | V | 5.80E-16 | 70   | 0   | Uncharacterized protein OS=Equus caballus GN=TDRD5 PE=4 SV=1                         |
| A0A0J9YJ00_DANRE | Eukarya | V | 5.90E-16 | 69.9 | 0   | Tudor domain-containing protein 7A (Fragment) OS=Danio rerio GN=tdrd7a PE=1 SV=2     |
| U5EFJ8_9DIPT     | Eukarya | A | 9.50E-16 | 69.3 | 0.9 | Putative oskar (Fragment) OS=Corethrella appendiculata PE=2 SV=1                     |
| H2USX7_TAKRU     | Eukarya | V | 9.60E-16 | 69.3 | 0   | Uncharacterized protein OS=Takifugu rubripes PE=4 SV=1                               |
| F1S6A1_PIG       | Eukarya | V | 1.10E-15 | 69.1 | 0   | Uncharacterized protein OS=Sus scrofa GN=TDRD5 PE=4 SV=2                             |
| T1DTM7_ANOAAQ    | Eukarya | A | 1.10E-15 | 69   | 0   | Uncharacterized protein (Fragment) OS=Anopheles aquasalis PE=2 SV=1                  |
| A0A060W2X9_ONCMY | Eukarya | V | 2.20E-15 | 68.1 | 0   | Uncharacterized protein OS=Oncorhynchus mykiss GN=GSONMT00078733001 PE=4 SV=1        |
| S7NG41_MYOBR     | Eukarya | V | 2.60E-15 | 67.9 | 0.1 | Tudor domain-containing protein 5 OS=Myotis brandtii GN=D623_10022817 PE=4 SV=1      |
| F7B4W0_MONDO     | Eukarya | V | 2.70E-15 | 67.8 | 0   | Uncharacterized protein OS=Monodelphis domestica GN=TDRD5 PE=4 SV=2                  |
| V9KH94_CALMI     | Eukarya | V | 3.50E-15 | 67.5 | 0   | Tudor domain-containing protein 5 OS=Callorhynchus milii PE=2 SV=1                   |
| A0A0P7YHR6_9TELE | Eukarya | V | 4.70E-15 | 67   | 0   | Uncharacterized protein OS=Scleropages formosus GN=Z043_114704 PE=4 SV=1             |
| G1PFT9_MYOLU     | Eukarya | V | 5.70E-15 | 66.8 | 0.1 | Uncharacterized protein OS=Myotis lucifugus GN=TDRD5 PE=4 SV=1                       |
| H3DL34_TETNG     | Eukarya | V | 7.70E-15 | 66.4 | 0   | Uncharacterized protein OS=Tetraodon nigroviridis PE=4 SV=1                          |
| A0A096NXU4_PAPAN | Eukarya | V | 8.70E-15 | 66.2 | 0   | Uncharacterized protein OS=Papio anubis GN=TDRD5 PE=4 SV=1                           |
| F7GPY1_CALJA     | Eukarya | V | 1.10E-14 | 65.9 | 0   | Uncharacterized protein OS=Callithrix jacchus GN=TDRD5 PE=4 SV=1                     |

|                  |         |   |          |      |     |                                                                                                    |
|------------------|---------|---|----------|------|-----|----------------------------------------------------------------------------------------------------|
| W5N030_LEPOC     | Eukarya | V | 1.20E-14 | 65.8 | 0.1 | Uncharacterized protein OS=Lepisosteus oculatus PE=4 SV=1                                          |
| M3VXB3_FELCA     | Eukarya | V | 1.30E-14 | 65.6 | 0   | Uncharacterized protein OS=Felis catus GN=TDRD5 PE=4 SV=1                                          |
| A0A099ZTT8_TINGU | Eukarya | V | 1.40E-14 | 65.6 | 0   | Tudor domain-containing protein 7 OS=Tinamus guttatus GN=N309_12928 PE=4 SV=1                      |
| G3R6R4_GORGO     | Eukarya | V | 1.50E-14 | 65.5 | 0   | Uncharacterized protein OS=Gorilla gorilla gorilla GN=TDRD5 PE=4 SV=1                              |
| L9L889_TUPCH     | Eukarya | V | 1.60E-14 | 65.4 | 0.3 | Tudor domain-containing protein 5 OS=Tupaia chinensis GN=TREES_T100015801 PE=4 SV=1                |
| A0A0J7KVQ7_LASNI | Eukarya | A | 1.70E-14 | 65.3 | 0   | Tudor domain-containing protein 5 (Fragment) OS=Lasius niger GN=RF55_5458 PE=4 SV=1                |
| E0VJL4_PEDHC     | Eukarya | A | 1.70E-14 | 65.3 | 0.9 | Putative uncharacterized protein OS=Pediculus humanus subsp. corporis GN=Phum_PHUM247930 PE=4 SV=1 |
| A0A0D9RID1_CHLSB | Eukarya | V | 1.70E-14 | 65.2 | 0   | Uncharacterized protein OS=Chlorocebus sabaeus GN=TDRD5 PE=4 SV=1                                  |
| E2BFZ8_HARSA     | Eukarya | A | 2.00E-14 | 65   | 0.9 | Tudor domain-containing protein 7 OS=Harpegnathos saltator GN=EAI_14615 PE=4 SV=1                  |
| A0A0T6AU98_9SCAR | Eukarya | A | 2.10E-14 | 65   | 3.9 | Uncharacterized protein (Fragment) OS=Oryctes borbonicus GN=AMK59_7658 PE=4 SV=1                   |
| R9PXP1_CHICK     | Eukarya | V | 2.30E-14 | 64.8 | 0   | Tudor domain-containing protein 7 OS=Gallus gallus GN=TDRD7 PE=4 SV=1                              |
| F7CN93_MACMU     | Eukarya | V | 2.70E-14 | 64.6 | 0   | Uncharacterized protein OS=Macaca mulatta GN=TDRD5 PE=4 SV=1                                       |
| A0A0A0MPC8_CANLF | Eukarya | V | 2.70E-14 | 64.6 | 0   | Tudor domain-containing protein 5 OS=Canis lupus familiaris GN=TDRD5 PE=4 SV=1                     |
| M3Y1J3_MUSPF     | Eukarya | V | 2.90E-14 | 64.5 | 0   | Uncharacterized protein OS=Mustela putorius furo GN=TDRD5 PE=4 SV=1                                |
| H2N4J0_PONAB     | Eukarya | V | 3.00E-14 | 64.5 | 0   | Uncharacterized protein OS=Pongo abelii GN=TDRD5 PE=4 SV=1                                         |
| H2Q0P6_PANTR     | Eukarya | V | 3.20E-14 | 64.4 | 0   | Uncharacterized protein OS=Pan troglodytes GN=TDRD5 PE=4 SV=1                                      |
| W5LEX2_ASTMX     | Eukarya | V | 3.50E-14 | 64.3 | 0   | Uncharacterized protein OS=Astyanax mexicanus PE=4 SV=1                                            |
| A0A024R910_HUMAN | Eukarya | V | 4.00E-14 | 64.1 | 0   | Tudor domain containing 5, isoform CRA_b OS=Homo sapiens GN=TDRD5 PE=4 SV=1                        |
| A0A0P6JFX9_HETGA | Eukarya | V | 4.10E-14 | 64.1 | 0   | Tudor domain-containing protein 5 isoform 2 OS=Heterocephalus glaber GN=TDRD5 PE=4 SV=1            |
| H0WXJ6_OTOGA     | Eukarya | V | 4.70E-14 | 63.8 | 0   | Uncharacterized protein OS>Otolemur garnettii GN=TDRD5 PE=4 SV=1                                   |
| H0V001_CAVPO     | Eukarya | V | 5.20E-14 | 63.7 | 0   | Uncharacterized protein OS=Cavia porcellus GN=TDRD5 PE=4 SV=1                                      |
| G7NU06_MACFA     | Eukarya | V | 5.80E-14 | 63.6 | 0   | Putative uncharacterized protein OS=Macaca fascicularis GN=EGM_01633 PE=4 SV=1                     |

|                  |          |   |          |      |      |                                                                                                           |
|------------------|----------|---|----------|------|------|-----------------------------------------------------------------------------------------------------------|
| G1S4T3_NOMLE     | Eukarya  | V | 6.40E-14 | 63.4 | 0    | Uncharacterized protein OS=Nomascus leucogenys GN=TDRD7 PE=4 SV=1                                         |
| G1M861_AILME     | Eukarya  | V | 6.80E-14 | 63.3 | 0    | Tudor domain-containing protein 5 OS=Ailuropoda melanoleuca GN=TDRD5 PE=4 SV=1                            |
| A0A061HYN9_CRIGR | Eukarya  | V | 7.10E-14 | 63.3 | 0    | Tudor domain-containing protein 5 OS=Cricetulus griseus GN=H671_5g14992 PE=4 SV=1                         |
| A0A0F8AWR5_LARCR | Eukarya  | V | 1.00E-13 | 62.7 | 0    | Tudor domain-containing protein 7A OS=Larimichthys crocea GN=EH28_10800 PE=4 SV=1                         |
| V5GPP4_ANOGL     | Eukarya  | A | 1.10E-13 | 62.6 | 1.4  | Tudor domain-containing protein (Fragment) OS=Anoplophora glabripennis GN=TDRD7 PE=4 SV=1                 |
| A0A087XQP1_POEFO | Eukarya  | V | 1.10E-13 | 62.6 | 0    | Uncharacterized protein OS=Poecilia formosa PE=4 SV=2                                                     |
| S4NW46_9NEOP     | Eukarya  | A | 1.20E-13 | 62.5 | 0    | Tudor domain containing 7 (Fragment) OS=Pararge aegeria PE=4 SV=1                                         |
| L5KMV4_PTEAL     | Eukarya  | V | 2.10E-13 | 61.8 | 0    | Tudor domain-containing protein 7 OS=Pteropus alecto GN=PAL_GLEAN10008027 PE=4 SV=1                       |
| I3NCP3 ICTTR     | Eukarya  | V | 2.40E-13 | 61.6 | 0    | Uncharacterized protein OS=Ictidomys tridecemlineatus GN=TDRD7 PE=4 SV=1                                  |
| G1SCH8_RABIT     | Eukarya  | V | 2.50E-13 | 61.5 | 0    | Uncharacterized protein OS=Oryctolagus cuniculus GN=TDRD7 PE=4 SV=1                                       |
| Q3TTK4_MOUSE     | Eukarya  | V | 2.50E-13 | 61.5 | 0    | Putative uncharacterized protein (Fragment) OS=Mus musculus GN=Tdrd7 PE=2 SV=1                            |
| A0A0H2UHC6_RAT   | Eukarya  | V | 3.90E-13 | 60.9 | 0    | Tudor domain-containing protein 5 OS=Rattus norvegicus GN=Tdrd5 PE=4 SV=1                                 |
| U6CRG5_NEOVI     | Eukarya  | V | 3.90E-13 | 60.9 | 0    | Tudor domain-containing protein 7 OS=Neovison vison GN=TDRD7 PE=2 SV=1                                    |
| K7FVR3_PELSI     | Eukarya  | V | 5.10E-13 | 60.5 | 0    | Uncharacterized protein OS=Pelodiscus sinensis GN=TDRD5 PE=4 SV=1                                         |
| J4K9P6_9FIRM     | Bacteria | F | 2.90E-07 | 42.1 | 31.8 | NYN domain protein OS=Peptostreptococcaceae bacterium AS15 GN=HMPREF1142_1162 PE=4 SV=1                   |
| E0QL58_9FIRM     | Bacteria | F | 0.00014  | 33.5 | 29.1 | Uncharacterized protein OS=[Eubacterium] yurii subsp. margaretiae ATCC 43715 GN=HMPREF0379_1756 PE=4 SV=1 |
| A0A0G0IVI6_9BACT | Bacteria | ? | 0.0025   | 29.5 | 1.9  | Uncharacterized protein OS=candidate division TM6 bacterium GW2011_GWA2_36_9 GN=US32_C0002G0021 PE=4 SV=1 |

69  
70

71 **Supplementary File 1D: List of sequences and their BLAST results used for phylogenetic analysis of the OSK domain.**

72 The sequences were obtained by searching the TrEMBL database using hmmsearch and the final HMM generated for OSK (Supplementary  
 73 files: HMM>OSK.hmm). Reported parameters are as described for Supplementary Table S3. To obtain sequences for each entry, either  
 74 search UniProt directly (<https://www.uniprot.org/>) or consult the final alignment in Supplementary Files: Alignments>OSK\_TREE.fasta.  
 75 Phylum Abbreviations: A = Arthropoda; Ar = Archaea; As = Ascomycota; B = Bacteroidetes; C = Cyanobacteria; Eu = Euryarchaeota; F =  
 76 Firmicutes; Fu = Fungi; P = Proteobacteria

77

| Accession Number | Domain  | Phylum | E-value  | Score | Bias | Description of target                                                                                                  |
|------------------|---------|--------|----------|-------|------|------------------------------------------------------------------------------------------------------------------------|
| A1Y1T7_DROIM     | Eukarya | A      | 2.90E-34 | 128.4 | 0.6  | Oskar OS=Drosophila immigrans GN=osk PE=4 SV=1                                                                         |
| F2WJY6_9HYME     | Eukarya | A      | 3.50E-34 | 128.2 | 0.9  | Oskar (Fragment) OS=Messor pergandei PE=2 SV=1                                                                         |
| B4JTJ1_DROGR     | Eukarya | A      | 5.00E-34 | 127.6 | 0.1  | GH23955 OS=Drosophila grimshawi GN=Dgr\GH23955 PE=4 SV=1<br>Maternal effect protein oskar OS=Acromyrmex echinator      |
| F4WQN7_ACREC     | Eukarya | A      | 8.10E-34 | 127   | 0.9  | GN=G5I_08127 PE=4 SV=1<br>Putative uncharacterized protein OS=Camponotus floridanus                                    |
| E2A7I8_CAMFO     | Eukarya | A      | 2.80E-33 | 125.2 | 0.4  | GN=EAG_03874 PE=4 SV=1<br>Maternal effect protein oskar OS=Ceratitis capitata GN=OSKA PE=2                             |
| W8CE30_CERCA     | Eukarya | A      | 5.80E-33 | 124.2 | 0.3  | SV=1<br>Maternal effect protein oskar OS=Bactrocera cucurbitae GN=osk                                                  |
| A0A0A1XRQ4_BACCU | Eukarya | A      | 7.50E-33 | 123.9 | 0.4  | PE=4 SV=1<br>Uncharacterized protein OS=Drosophila willistoni GN=Dwi\GK11117                                           |
| B4N815_DROWI     | Eukarya | A      | 8.10E-33 | 123.8 | 0.3  | PE=4 SV=2<br>Maternal effect protein oskar OS=Cerapachys biroii GN=X777_01612                                          |
| A0A026WMY1_CERBI | Eukarya | A      | 2.40E-32 | 122.3 | 0.7  | PE=4 SV=1<br>Putative uncharacterized protein (Fragment) OS=Solenopsis invicta                                         |
| E9IZ46_SOLIN     | Eukarya | A      | 2.50E-32 | 122.2 | 0.1  | GN=SINV_01516 PE=4 SV=1<br>Maternal effect protein oskar OS=Bactrocera dorsalis GN=OSKA                                |
| A0A034WRF5_BACDO | Eukarya | A      | 2.70E-32 | 122.1 | 0.5  | PE=4 SV=1<br>Maternal effect protein oskar OS=Bactrocera latifrons GN=osk_2                                            |
| A0A0K8U7J3_BACLA | Eukarya | A      | 5.70E-32 | 121   | 0.5  | PE=4 SV=1                                                                                                              |
| Q2PP79_AEDAE     | Eukarya | A      | 6.30E-32 | 120.9 | 0.1  | Oskar OS=Aedes aegypti PE=4 SV=1<br>Uncharacterized protein OS=Drosophila mojavensis                                   |
| B4K9E5_DROMO     | Eukarya | A      | 8.60E-32 | 120.5 | 0.1  | GN=Dmoj\GI10055 PE=4 SV=2                                                                                              |
| B4LXK5_DROVI     | Eukarya | A      | 1.20E-31 | 120   | 0.1  | Oskar OS=Drosophila virilis GN=osk PE=4 SV=1                                                                           |
| A0A0M4F3M8_DROBS | Eukarya | A      | 1.80E-31 | 119.4 | 0.4  | Osk OS=Drosophila busckii GN=Dbus_chr3Rg607 PE=4 SV=1<br>Uncharacterized protein OS=Lucilia cuprina GN=FF38_12727 PE=4 |
| A0A0L0CP24_LUCCU | Eukarya | A      | 2.90E-31 | 118.8 | 1.5  | SV=1<br>Uncharacterized protein OS=Drosophila yakuba GN=Dyak\GE25914                                                   |
| B4PTX6_DROYA     | Eukarya | A      | 1.00E-30 | 117   | 0.5  | PE=4 SV=1                                                                                                              |

|                  |          |   |          |       |     |                                                                                                        |
|------------------|----------|---|----------|-------|-----|--------------------------------------------------------------------------------------------------------|
| B3P1W4_DROER     | Eukarya  | A | 2.70E-30 | 115.6 | 0.5 | GG13545 OS=Drosophila erecta GN=Dere\GG13545 PE=4 SV=1                                                 |
| T1PG45_MUSDO     | Eukarya  | A | 4.20E-30 | 115.1 | 0.7 | GDSL-like Lipase/Acylhydrolase OS=Musca domestica PE=2 SV=1                                            |
| B4HKZ1_DROSE     | Eukarya  | A | 5.20E-30 | 114.8 | 0.2 | GM23770 OS=Drosophila sechellia GN=Dsec\GM23770 PE=4 SV=1                                              |
| Q295Q4_DROPS     | Eukarya  | A | 6.40E-30 | 114.5 | 0.2 | Uncharacterized protein, isoform A OS=Drosophila pseudoobscura pseudoobscura GN=Dpse\GA10627 PE=4 SV=2 |
| E8NH25_DROME     | Eukarya  | A | 7.30E-30 | 114.3 | 0.2 | RE24380p (Fragment) OS=Drosophila melanogaster GN=osk-RA PE=2 SV=1                                     |
| T1DTM7_ANO AQ    | Eukarya  | A | 1.00E-29 | 113.8 | 0   | Uncharacterized protein (Fragment) OS=Anopheles aquasalis PE=2 SV=1                                    |
| B3LZ06_DROAN     | Eukarya  | A | 2.20E-28 | 109.5 | 0.1 | Uncharacterized protein OS=Drosophila ananassae GN=Dana\GF17692 PE=4 SV=1                              |
| E1A883_NASVI     | Eukarya  | A | 4.20E-28 | 108.6 | 0.2 | Oskar OS=Nasonia vitripennis PE=2 SV=1                                                                 |
| A0A084WRU4_ANOSI | Eukarya  | A | 1.30E-27 | 107.1 | 0.1 | AGAP003545-PA-like protein OS=Anopheles sinensis GN=ZHAS_00021239 PE=4 SV=1                            |
| W5JJ85_ANODA     | Eukarya  | A | 4.50E-27 | 105.3 | 0   | Uncharacterized protein OS=Anopheles darlingi GN=AND_005442 PE=4 SV=1                                  |
| Q7PQJ3_ANOGA     | Eukarya  | A | 6.00E-27 | 104.9 | 0   | AGAP003545-PA OS=Anopheles gambiae GN=osk PE=4 SV=3                                                    |
| B0WIV7_CULQU     | Eukarya  | A | 1.30E-26 | 103.9 | 0.4 | Oskar OS=Culex quinquefasciatus GN=CpipJ_CPIJ007471 PE=2 SV=1                                          |
| U5EFJ8_9DIPT     | Eukarya  | A | 4.00E-25 | 99.1  | 0   | Putative oskar (Fragment) OS=Corethrella appendiculata PE=2 SV=1                                       |
| A0A126GUR4_DROME | Eukarya  | A | 3.10E-24 | 96.2  | 0.3 | Oskar, isoform D OS=Drosophila melanogaster GN=osk PE=4 SV=1                                           |
| A0A059PGF2_9MUSC | Eukarya  | A | 3.10E-24 | 96.2  | 0.5 | GA10627 (Fragment) OS=Drosophila pseudoobscura GN=GA10627 PE=4 SV=1                                    |
| K4MTL4_GRYBI     | Eukarya  | A | 1.20E-23 | 94.2  | 0.2 | Oskar OS=Gryllus bimaculatus PE=2 SV=1                                                                 |
| A0A0C9QHR7_9HYME | Eukarya  | A | 5.40E-22 | 89    | 0   | Osk protein OS=Fopius arisanus GN=osk PE=4 SV=1                                                        |
| A0A059PF64_9MUSC | Eukarya  | A | 1.90E-19 | 80.8  | 0.7 | GA10627 (Fragment) OS=Drosophila pseudoobscura GN=GA10627 PE=4 SV=1                                    |
| A0A0J7KH44_LASNI | Eukarya  | A | 1.40E-13 | 61.9  | 0   | Maternal effect protein oskar (Fragment) OS=Lasius niger GN=RF55_10783 PE=4 SV=1                       |
| E2BYH0_HARSA     | Eukarya  | A | 4.00E-12 | 57.3  | 0   | Putative uncharacterized protein OS=Harpegnathos saltator GN=EAI_08923 PE=4 SV=1                       |
| A0A0J6BBM7_BREBE | Bacteria | F | 3.10E-10 | 51.2  | 0   | Lysophospholipase OS=Brevibacillus brevis GN=AB432_04505 PE=4 SV=1                                     |
| A0A0H0SJ00_9BACL | Bacteria | F | 9.60E-10 | 49.6  | 0   | Lysophospholipase OS=Brevibacillus formosus GN=AA984_15375 PE=4 SV=1                                   |
| E9I8K8_SOLIN     | Bacteria | A | 5.90E-09 | 47.1  | 1   | Putative uncharacterized protein (Fragment) OS=Solenopsis invicta GN=SINV_16199 PE=4 SV=1              |
| J3A568_9BACL     | Bacteria | F | 5.80E-08 | 43.9  | 0   | Lysophospholipase L1-like esterase OS=Brevibacillus sp. BC25 GN=PMI05_03395 PE=4 SV=1                  |



|                  |          |   |          |      |     |                                                                                                                                           |
|------------------|----------|---|----------|------|-----|-------------------------------------------------------------------------------------------------------------------------------------------|
| G2HS43_9PROT     | Bacteria | P | 1.10E-07 | 43   | 1   | Lipolytic protein OS=Arcobacter sp. L GN=ABLL_2651 PE=4 SV=1                                                                              |
| E6L4E3_9PROT     | Bacteria | P | 1.70E-07 | 42.4 | 0.7 | Lipolytic protein OS=Arcobacter butzleri JV22<br>GN=HMPREF9401_1319 PE=4 SV=1                                                             |
| R5GT16_9FIRM     | Bacteria | F | 2.60E-07 | 41.8 | 0   | GDSL-like protein OS=Eubacterium sp. CAG:786 GN=BN782_00012<br>PE=4 SV=1                                                                  |
| A0A078KJ49_9FIRM | Bacteria | F | 3.40E-07 | 41.4 | 0   | Uncharacterized protein OS=[Clostridium] cellulosi<br>GN=CCDG5_0508 PE=4 SV=1                                                             |
| A8EWS4_ARCB4     | Bacteria | P | 3.80E-07 | 41.3 | 0.7 | Lipolytic enzyme, GDSL domain OS=Arcobacter butzleri (strain<br>RM4018) GN=Abu_2183 PE=4 SV=1                                             |
| S5PEQ8_9PROT     | Bacteria | P | 4.00E-07 | 41.2 | 0.4 | Lipolytic enzyme, GDSL domain protein OS=Arcobacter butzleri 7h1h<br>GN=A7H1H_2115 PE=4 SV=1                                              |
| A0A0G9K3L5_9PROT | Bacteria | P | 4.00E-07 | 41.2 | 0.6 | Lipolytic protein OS=Arcobacter butzleri L348 GN=AA20_04280<br>PE=4 SV=1                                                                  |
| R6T7B3_9BACE     | Bacteria | B | 4.80E-07 | 41   | 0   | GDSL-like protein OS=Bacteroides sp. CAG:770 GN=BN777_00744<br>PE=4 SV=1                                                                  |
| A0A0A6S1U2_STRUB | Bacteria | F | 4.90E-07 | 40.9 | 0.2 | Acylneuraminate cytidyltransferase OS=Streptococcus uberis<br>GN=NC01_08240 PE=4 SV=1                                                     |
| W3AC50_9BACL     | Bacteria | F | 5.50E-07 | 40.8 | 0.3 | Uncharacterized protein OS=Planomicrobium glaciei CHR43<br>GN=G159_16940 PE=4 SV=1                                                        |
| A0A0M1UPT0_9PROT | Bacteria | P | 5.50E-07 | 40.8 | 0.4 | Lipolytic protein OS=Arcobacter butzleri ED-1 GN=ABED_1978 PE=4<br>SV=1                                                                   |
| U6EVC2_CLOTA     | Bacteria | F | 6.30E-07 | 40.6 | 0.7 | Platelet activating factor acetylhydrolase-like protein OS=Clostridium<br>tetani 12124569 GN=BN906_00617 PE=4 SV=1                        |
| A0A098EIL2_9BACL | Bacteria | F | 7.90E-07 | 40.3 | 0.1 | Multifunctional acyl-CoA thioesterase I and protease I and<br>lysophospholipase L1 OS=Planomicrobium sp. ES2<br>GN=BN1080_01055 PE=4 SV=1 |
| A0A069S7Q5_9PORP | Bacteria | B | 1.10E-06 | 39.9 | 0   | Uncharacterized protein OS=Parabacteroides distasonis str. 3776<br>Po2 i GN=M090_4091 PE=4 SV=1                                           |
| Q897X6_CLOTE     | Bacteria | F | 1.20E-06 | 39.7 | 0.8 | Platelet activating factor acetylhydrolase-like protein OS=Clostridium<br>tetani (strain Massachusetts / E88) GN=CTC_00594 PE=4 SV=1      |
| A0A0J9FZD4_9PORP | Bacteria | B | 1.30E-06 | 39.6 | 0   | Uncharacterized protein OS=Parabacteroides sp. D26<br>GN=HMPREF1000_00856 PE=4 SV=1                                                       |
| K9WJ28_9CYAN     | Bacteria | C | 1.60E-06 | 39.3 | 1.2 | Lysophospholipase L1-like esterase OS=Microcoleus sp. PCC 7113<br>GN=Mic7113_4114 PE=4 SV=1                                               |
| A0A0G1KN57_9BACT | Bacteria | ? | 3.70E-06 | 38.1 | 0   | Secreted protein OS=candidate division WWE3 bacterium<br>GW2011_GWC2_44_9 GN=UW82_C0006G0015 PE=4 SV=1                                    |
| R5VMZ1_9FIRM     | Bacteria | F | 5.00E-06 | 37.7 | 0.1 | GDSL-like protein OS=Firmicutes bacterium CAG:631<br>GN=BN742_01282 PE=4 SV=1                                                             |
| A0A0L0WAR6_CLOPU | Bacteria | F | 7.20E-06 | 37.2 | 0.4 | Lysophospholipase L1 OS=Clostridium purinilyticum<br>GN=CLPU_6c00720 PE=4 SV=1                                                            |
| R5S0B3_9BACE     | Bacteria | B | 7.30E-06 | 37.2 | 0   | GDSL-like protein OS=Bacteroides sp. CAG:545 GN=BN702_00435<br>PE=4 SV=1                                                                  |



|                  |          |    |          |      |     |                                                                                                                                            |
|------------------|----------|----|----------|------|-----|--------------------------------------------------------------------------------------------------------------------------------------------|
| A0A073IAZ3_9PORP | Bacteria | B  | 7.60E-06 | 37.1 | 0   | Uncharacterized protein OS=Porphyromonas sp. 31_2<br>GN=HMPREF1002_01104 PE=4 SV=1                                                         |
| R4JC30_9BACT     | Bacteria | ?  | 7.90E-06 | 37.1 | 0.1 | Uncharacterized protein OS=uncultured bacterium BAC25G1<br>GN=metaSSY_00600 PE=4 SV=1                                                      |
| A0A0C1UEU0_9CLOT | Bacteria | F  | 7.90E-06 | 37   | 0.8 | GDSL-like Lipase/Acylhydrolase family protein OS=Clostridium<br>argentinense CDC 2741 GN=U732_2423 PE=4 SV=1                               |
| R5LL12_9FIRM     | Bacteria | F  | 1.00E-05 | 36.7 | 0   | GDSL-like protein OS=Eubacterium sp. CAG:115 GN=BN470_02036<br>PE=4 SV=1                                                                   |
| A0A0E3QN36_METBA | Archaea  | Eu | 1.20E-05 | 36.5 | 0.2 | Putative tesA-like protease OS=Methanosarcina barkeri str.<br>Wiesmoor GN=MSBRW_2234 PE=4 SV=1                                             |
| B7KKA6_CYAP7     | Bacteria | C  | 1.60E-05 | 36.1 | 0.3 | Lipolytic protein G-D-S-L family OS=Cyanotheca sp. (strain PCC<br>7424) GN=PCC7424_2577 PE=4 SV=1                                          |
| R2P1Z4_9ENTE     | Bacteria | F  | 1.60E-05 | 36   | 0.1 | Uncharacterized protein OS=Enterococcus raffinosus ATCC 49464<br>GN=UAK_02837 PE=4 SV=1                                                    |
| A0A072Y8N5_9CLOT | Bacteria | F  | 1.80E-05 | 35.9 | 1.5 | Acetylhydrolase OS=Clostridium sp. K25 GN=Z957_08245 PE=4<br>SV=1                                                                          |
| K8GFE2_9CYAN     | Bacteria | C  | 2.00E-05 | 35.8 | 0.1 | Lysophospholipase L1-like esterase OS=Oscillatoriales<br>cyanobacterium JSC-12 GN=OscopyDRAFT_3941 PE=4 SV=1                               |
| A0A095ZDI3_9FIRM | Bacteria | F  | 2.00E-05 | 35.8 | 0.3 | Uncharacterized protein OS=Tissierellia bacterium S7-1-4<br>GN=HMPREF1634_08565 PE=4 SV=1                                                  |
| E1YW67_9PORP     | Bacteria | B  | 2.20E-05 | 35.6 | 0   | GDSL-like protein OS=Parabacteroides sp. 20_3<br>GN=HMPREF9008_00759 PE=4 SV=1                                                             |
| A0A0M0WNM0_9BACI | Bacteria | F  | 2.60E-05 | 35.4 | 0.4 | Lipase OS=Bacillus sp. FJAT-21351 GN=AMS61_13120 PE=4 SV=1                                                                                 |
| A0A0G3CFD7_METBA | Archaea  | Eu | 2.80E-05 | 35.3 | 0.1 | GDSL family lipase/acylhydrolase OS=Methanosarcina barkeri CM1<br>GN=MCM1_0752 PE=4 SV=1                                                   |
| F6DQC0_DESRL     | Bacteria | F  | 3.40E-05 | 35   | 0   | Lipolytic protein G-D-S-L family OS=Desulfotomaculum ruminis<br>(strain ATCC 23193 / DSM 2154 / NCIB 8452 / DL) GN=Desru_1430<br>PE=4 SV=1 |
| D5DGY9_BACMD     | Bacteria | F  | 3.50E-05 | 35   | 0.5 | Lipase/Acylhydrolase (GDSL) OS=Bacillus megaterium (strain DSM<br>319) GN=BMD_3140 PE=4 SV=1                                               |
| A5N8N5_CLOK5     | Bacteria | F  | 3.70E-05 | 34.9 | 1.6 | Uncharacterized protein OS=Clostridium kluyveri (strain ATCC 8527 /<br>DSM 555 / NCIMB 10680) GN=CKL_1624 PE=4 SV=1                        |
| R7ADB4_9BACE     | Bacteria | F  | 3.90E-05 | 34.8 | 0.2 | Uncharacterized protein OS=Bacteroides pectinophilus CAG:437<br>GN=BN656_00903 PE=4 SV=1                                                   |
| A0A0H1UPZ9_STRAG | Bacteria | F  | 4.30E-05 | 34.7 | 0.2 | Acylneuraminate cytidyltransferase OS=Streptococcus agalactiae<br>GN=WA03_09270 PE=4 SV=1                                                  |
| A0A094AE00_9PEZI | Eukarya  | As | 0.00036  | 31.7 | 0.1 | Uncharacterized protein (Fragment) OS=Pseudogymnoascus sp.<br>VKM F-4281 (FW-2241) GN=V493_03380 PE=4 SV=1                                 |
| A0A0L1HYX4_9PLEO | Eukarya  | As | 0.00066  | 30.9 | 0   | Carbohydrate esterase family 3 protein OS=Stemphylium lycopersici<br>GN=TW65_91054 PE=4 SV=1                                               |

|              |         |    |         |      |     |                                                                                                                                           |
|--------------|---------|----|---------|------|-----|-------------------------------------------------------------------------------------------------------------------------------------------|
| G2QGB0_MYCTT | Eukarya | As | 0.00074 | 30.7 | 0.1 | Carbohydrate esterase family 3 protein OS=Myceliophthora thermophila (strain ATCC 42464 / BCRC 31852 / DSM 1799) GN=MYCTH_53698 PE=4 SV=1 |
| E3RJZ5_PYRTT | Eukarya | As | 0.0014  | 29.8 | 0   | Putative uncharacterized protein OS=Pyrenophora teres f. teres (strain 0-1) GN=PTT_08513 PE=4 SV=1                                        |
| G2QVW9_THITE | Eukarya | As | 0.0066  | 27.7 | 0.1 | Carbohydrate esterase family 3 protein OS=Thielavia terrestris (strain ATCC 38088 / NRRL 8126) GN=THITE_2042744 PE=4 SV=1                 |
| G0S9F4_CHATD | Eukarya | As | 0.01    | 27.1 | 0   | Putative uncharacterized protein OS=Chaetomium thermophilum (strain DSM 1495 / CBS 144.50 / IMI 039719) GN=CTHT_0045680 PE=4 SV=1         |

78

79 **Supplementary File 1E: List of genomes analyzed for codon use.**

80 This table lists the 17 genomes that were downloaded and analyzed for codon use as described in  
 81 “*Selection of sequences for codon use analysis*” in Methods. All genomes can be downloaded from  
 82 <https://www.ncbi.nlm.nih.gov/genome/browse#!/overview/>. The table lists the species name (*Species*),  
 83 family (*Family*) and Order (*Order*), NCBI genome accession number (*Genome ID*), and the *oskar*  
 84 NCBI Nucleotide accession number (*oskar Nucleotide ID*).  
 85

| <b>Species</b>                 | <b>Family</b>  | <b>Order</b> | <b>Genome ID</b> | <b>Oskar Nucleotide ID††</b> |
|--------------------------------|----------------|--------------|------------------|------------------------------|
| <i>Drosophila melanogaster</i> | Drosophilidae  | Diptera      | GCA_001014345.1  | NM_169248.4                  |
| <i>Nasonia vitripennis</i>     | Pteromalidae   | Hymenoptera  | GCA_000002325.2  | HM535628.1                   |
| <i>Culex quinquefasciatus</i>  | Culicidae      | Diptera      | GCA_000209185.1  | EU517695.1                   |
| <i>Drosophila virilis</i>      | Drosophilidae  | Diptera      | GCA_000005245.1  | L22556.1                     |
| <i>Ceratitis capitata</i>      | Tephritidae    | Diptera      | GCA_000347755.4  | LOC101450245                 |
| <i>Musca domestica</i>         | Muscidae       | Diptera      | GCA_000371365.1  | LOC101890691                 |
| <i>Acromyrmex echinatior</i>   | Formicidae     | Hymenoptera  | GCA_000204515.1  | LOC105147973                 |
| <i>Harpegnathos saltator</i>   | Formicidae     | Hymenoptera  | GCA_000147195.1  | LOC105187957                 |
| <i>Bactrocera dorsalis</i>     | Tephritidae    | Diptera      | GCA_000789215.2  | LOC105232054                 |
| <i>Fopius arisanus</i>         | Braconidae     | Hymenoptera  | GCA_000806365.1  | LOC105267990                 |
| <i>Athalia rosae</i>           | Tenthredinidae | Hymenoptera  | GCA_000344095.2  | LOC105692731                 |
| <i>Orussus abietinus</i>       | Orussidae      | Hymenoptera  | GCA_000612105.2  | LOC105696794                 |
| <i>Stomoxys calcitrans</i>     | Muscidae       | Diptera      | GCA_001015335.1  | LOC106086381                 |
| <i>Bactrocera oleae</i>        | Tephritidae    | Diptera      | GCA_001188975.2  | LOC106622417                 |
| <i>Copidosoma floridanum</i>   | Encyrtidae     | Hymenoptera  | GCA_000648655.2  | LOC106642594                 |
| <i>Polistes canadensis</i>     | Vespidae       | Hymenoptera  | GCA_001313835.1  | LOC106790143                 |
| <i>Neodiprion lecontei</i>     | Diprionidae    | Hymenoptera  | GCF_001263575.1  | LOC107223453                 |

86
