# Supplementary figures and images for: Bacterial contribution to genesis of the novel germ line determinant oskar
Source: eLife journal article supplement (doi:10.7554/elife.45539), 2020-02-24

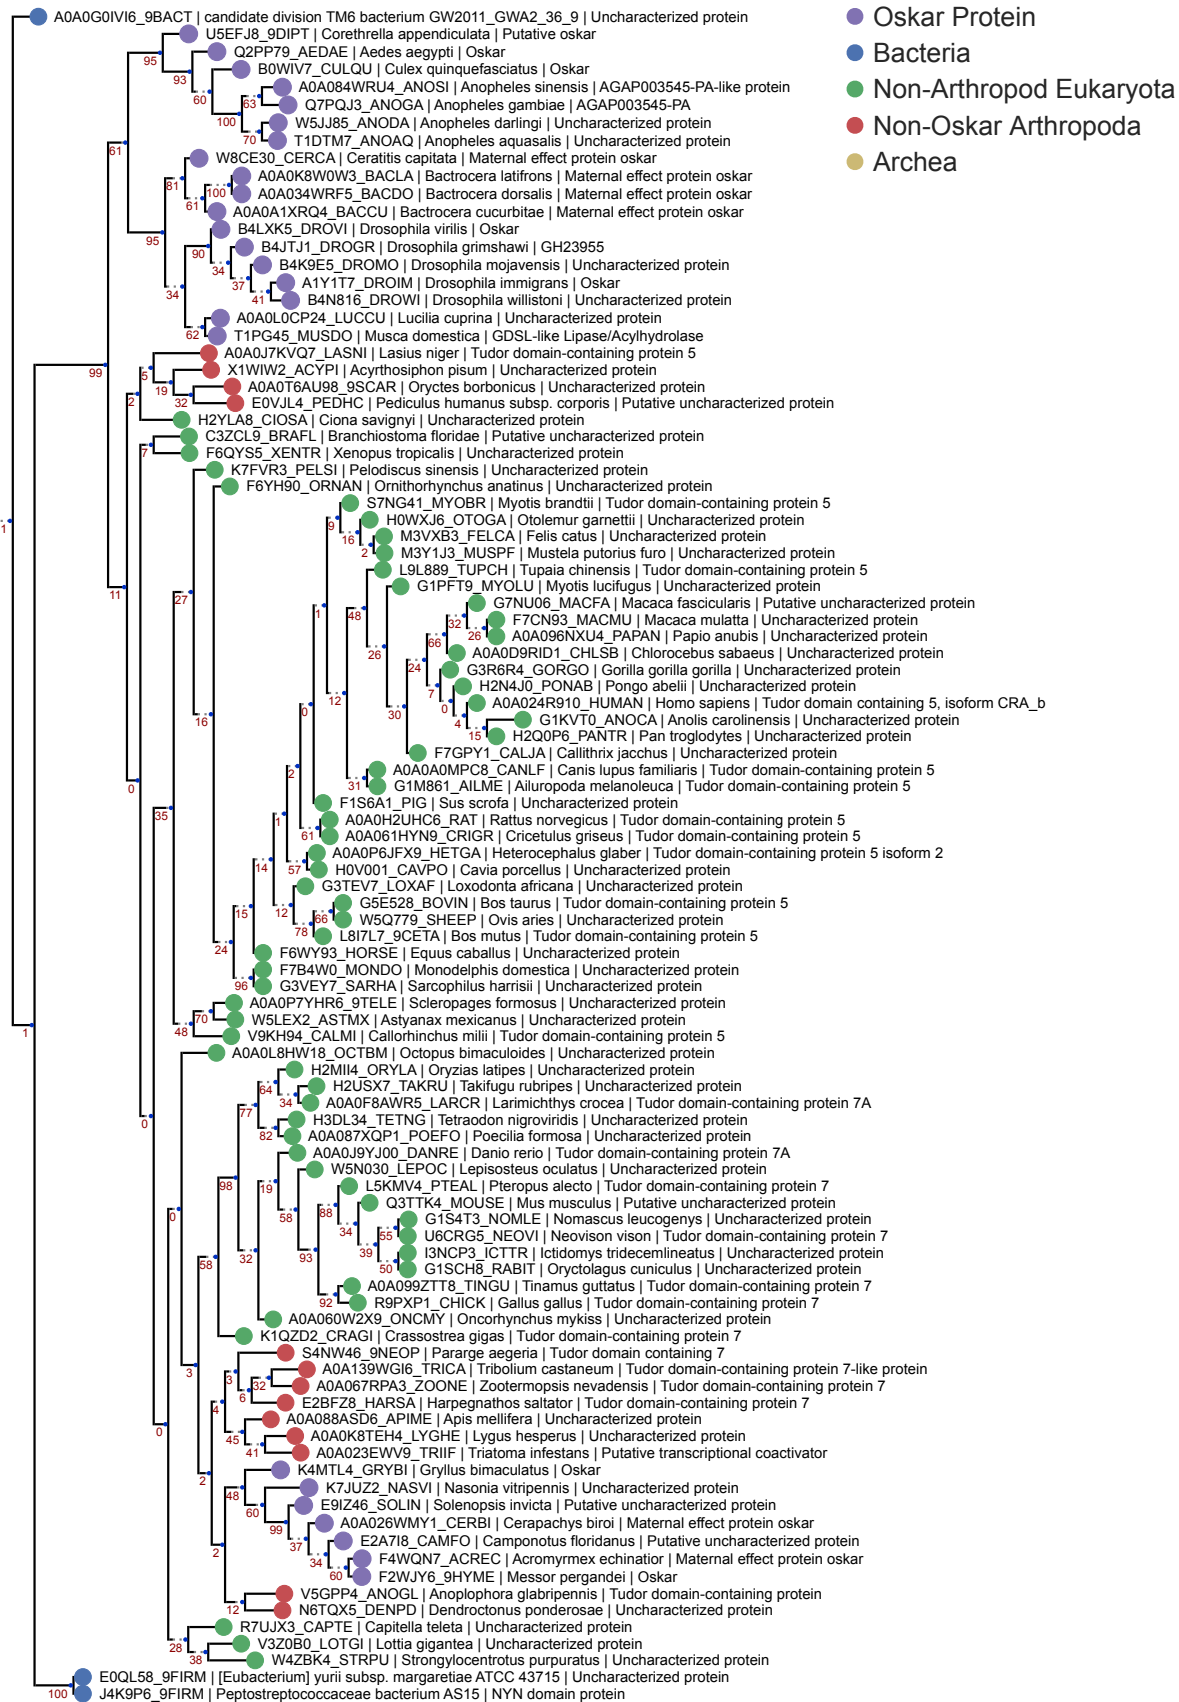

Supplement: supp [file elife_poa_e45539_Figure_2_figure_supplement_1.pdf › elife_poa_e45539_Figure_2_figure_supplement_1.pdf]

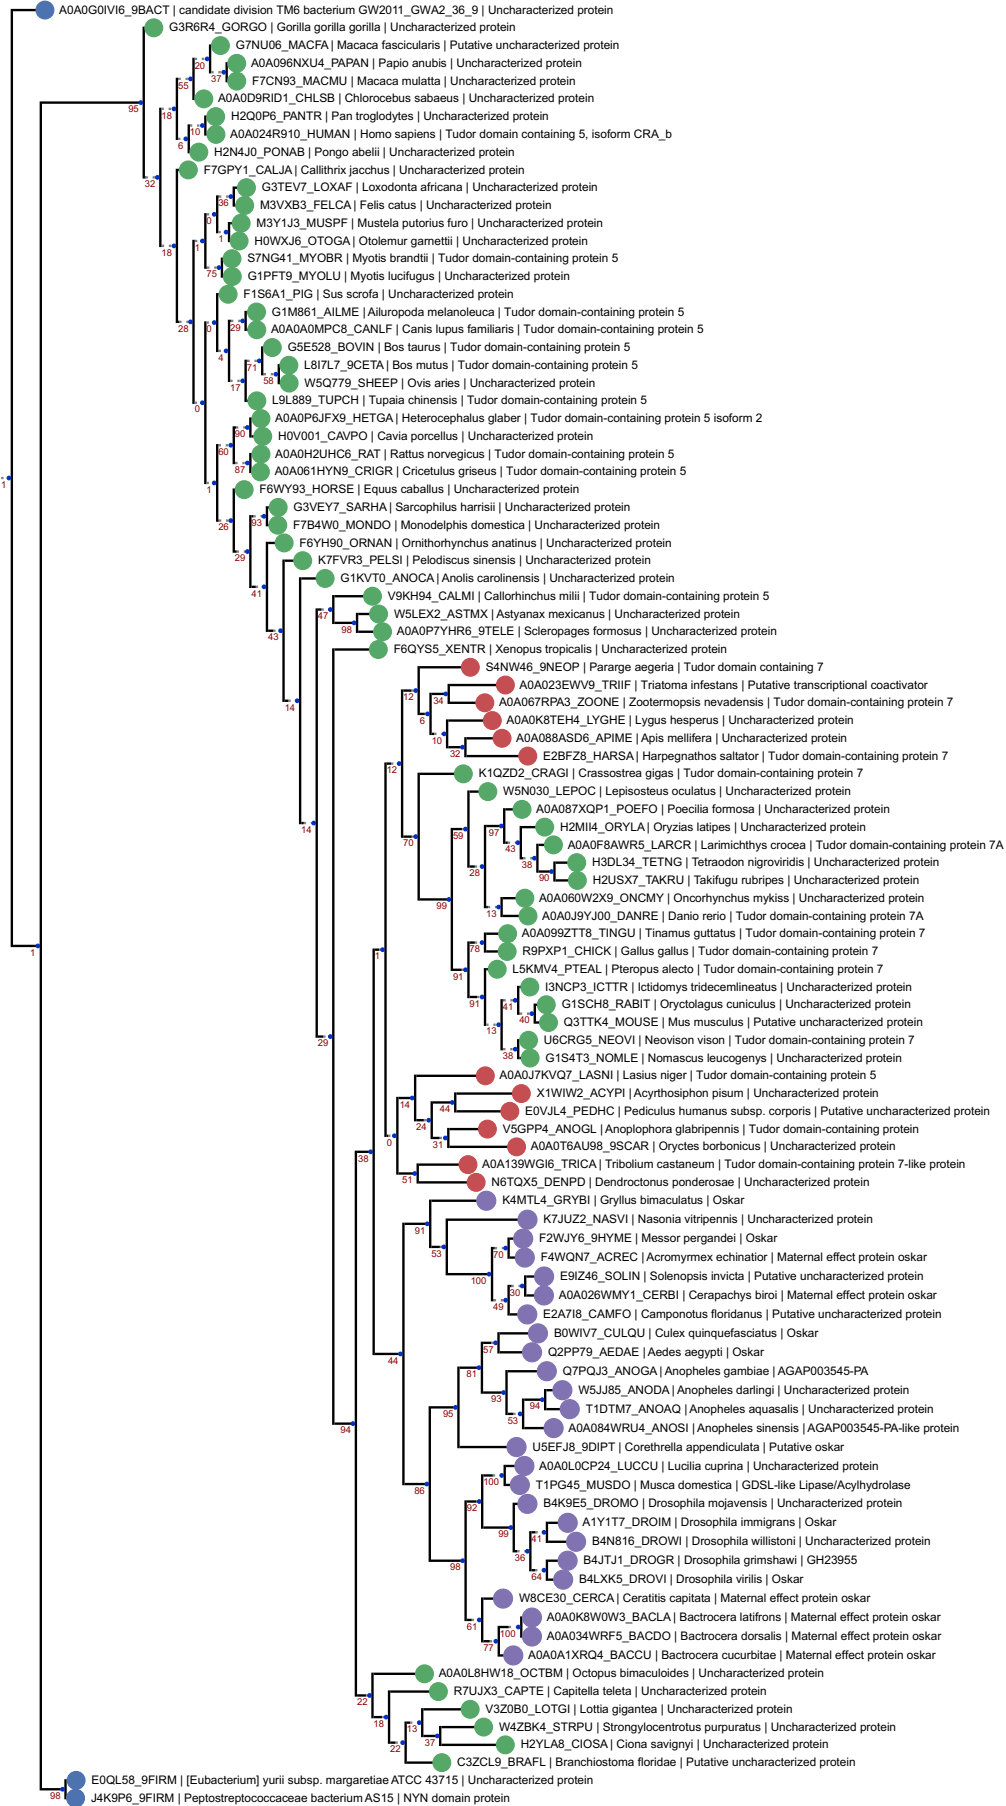

Supplement: supp [file elife_poa_e45539_Figure_2_figure_supplement_10.pdf › elife_poa_e45539_Figure_2_figure_supplement_10.pdf]

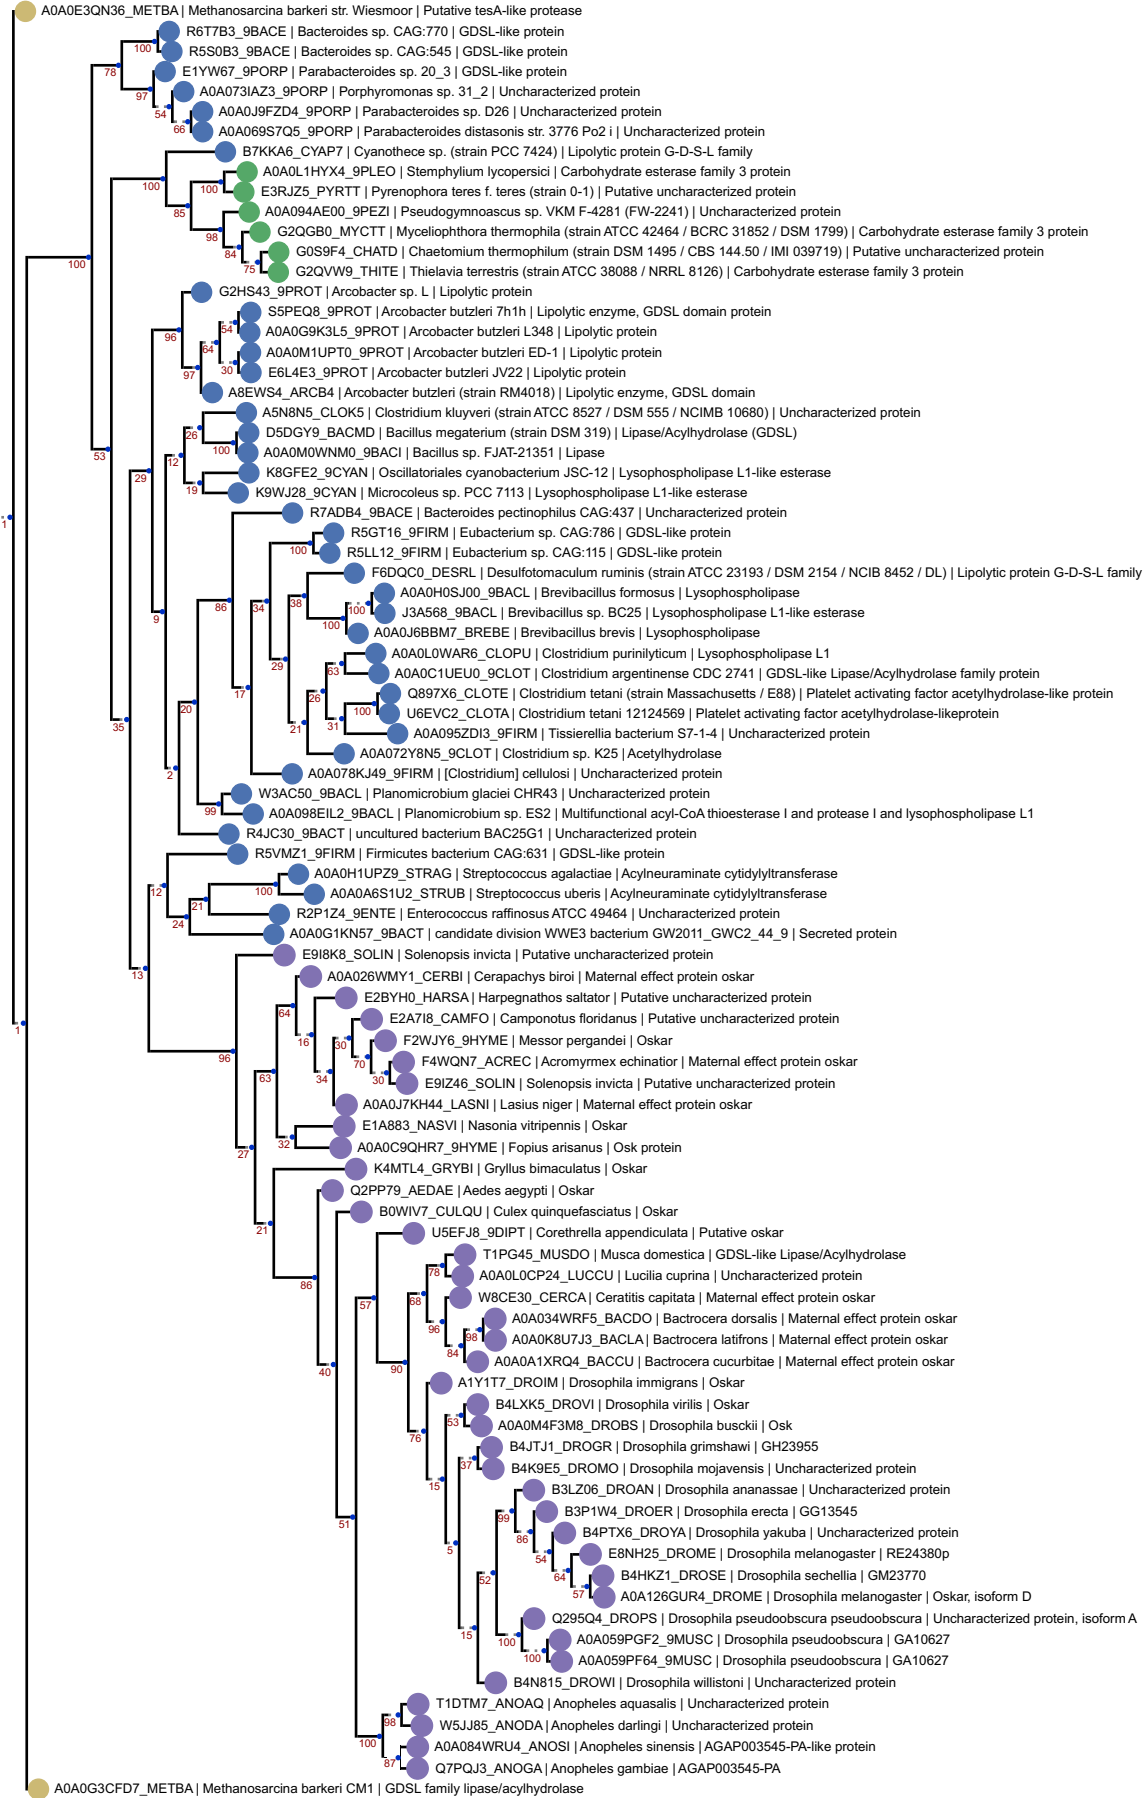

Supplement: supp [file elife_poa_e45539_Figure_2_figure_supplement_11.pdf › elife_poa_e45539_Figure_2_figure_supplement_11.pdf]

# MUSCLE tree

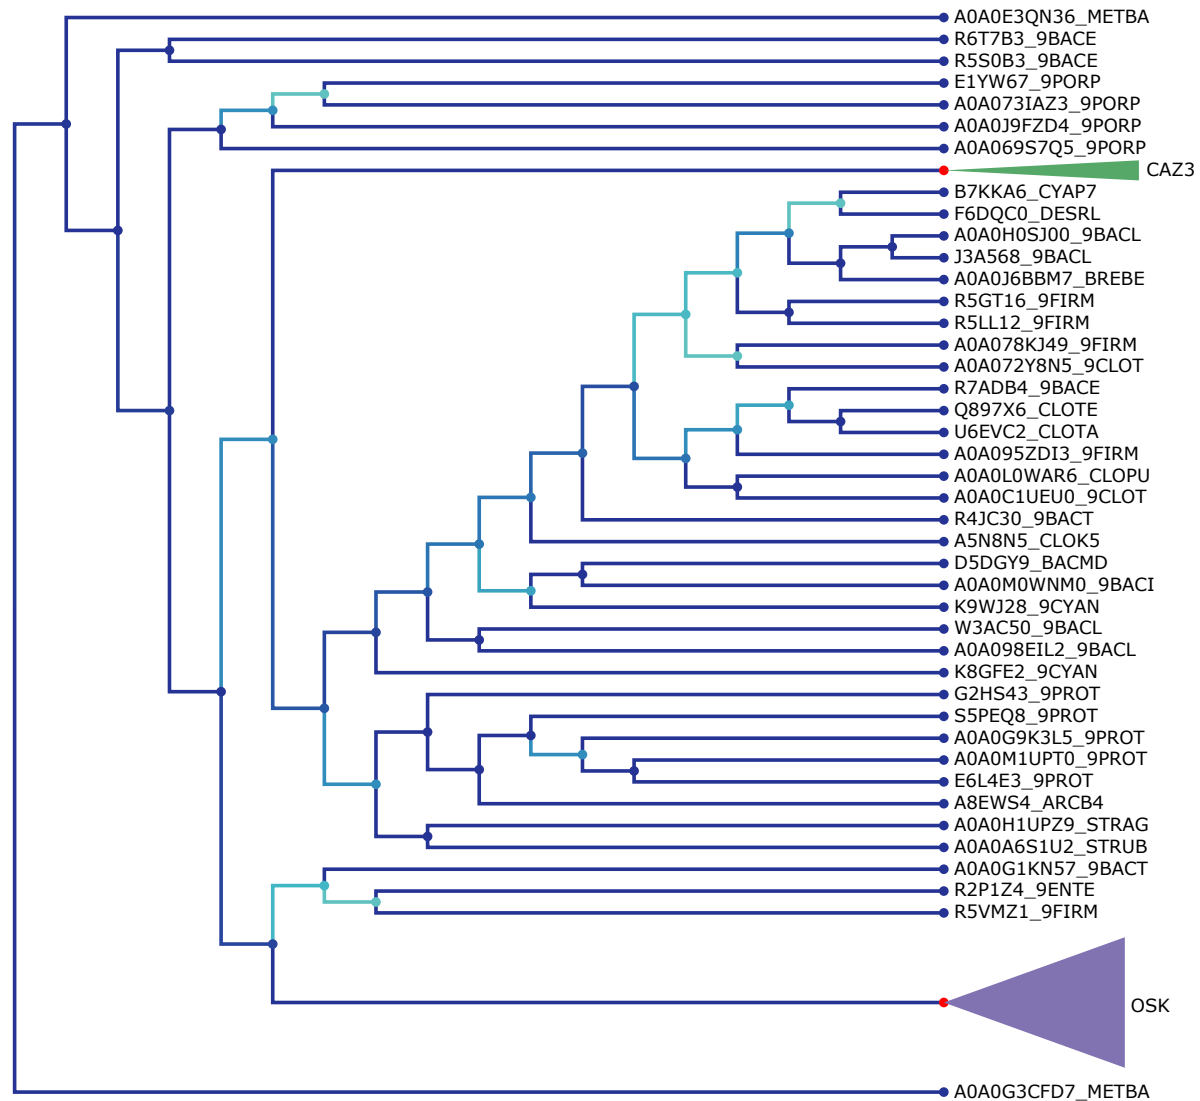

# T COFFEE tree

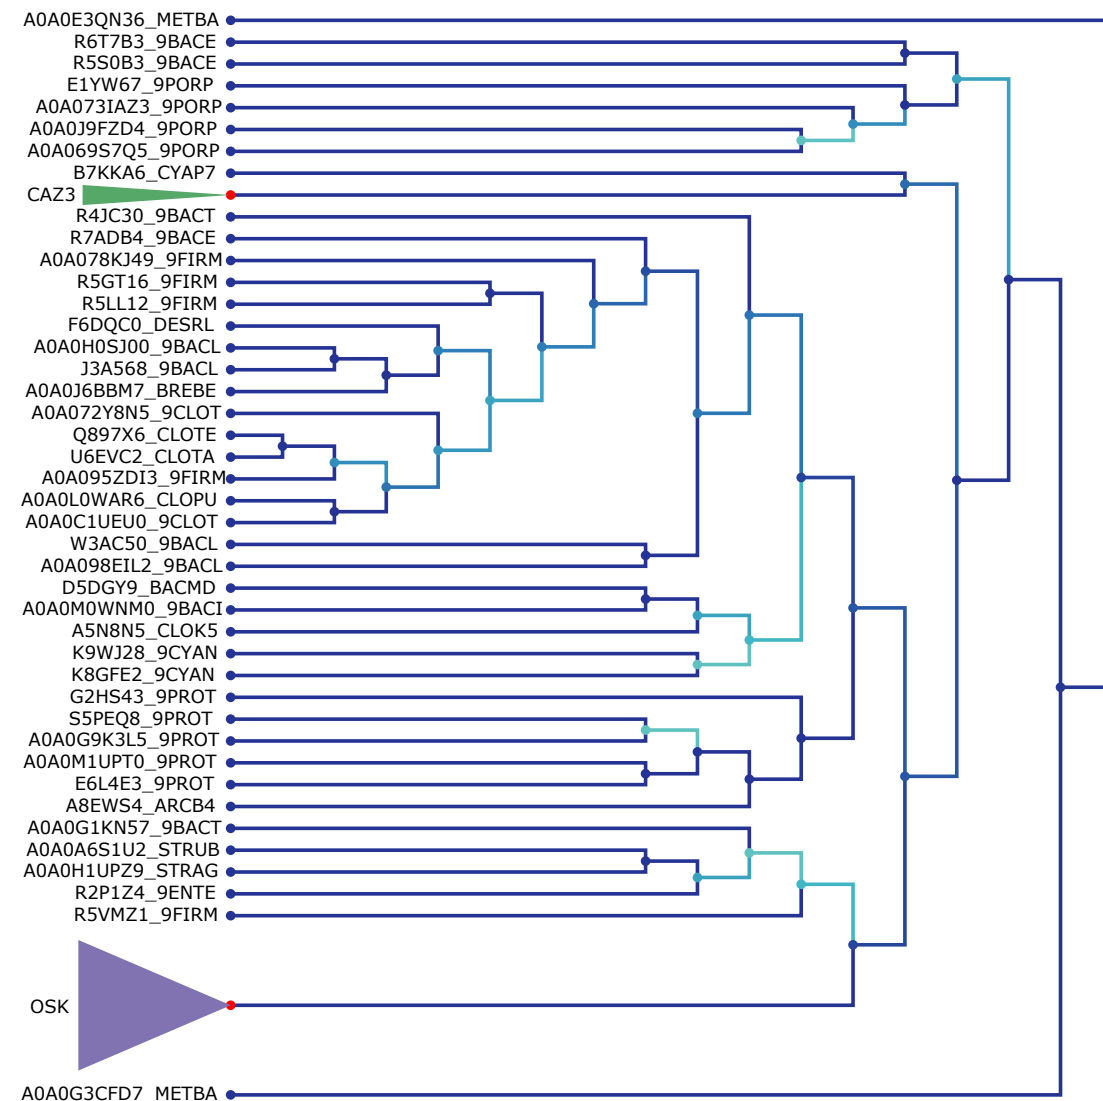

Supplement: supp [file elife_poa_e45539_Figure_2_figure_supplement_12.pdf › elife_poa_e45539_Figure_2_figure_supplement_12.pdf]

MUSCLE tree

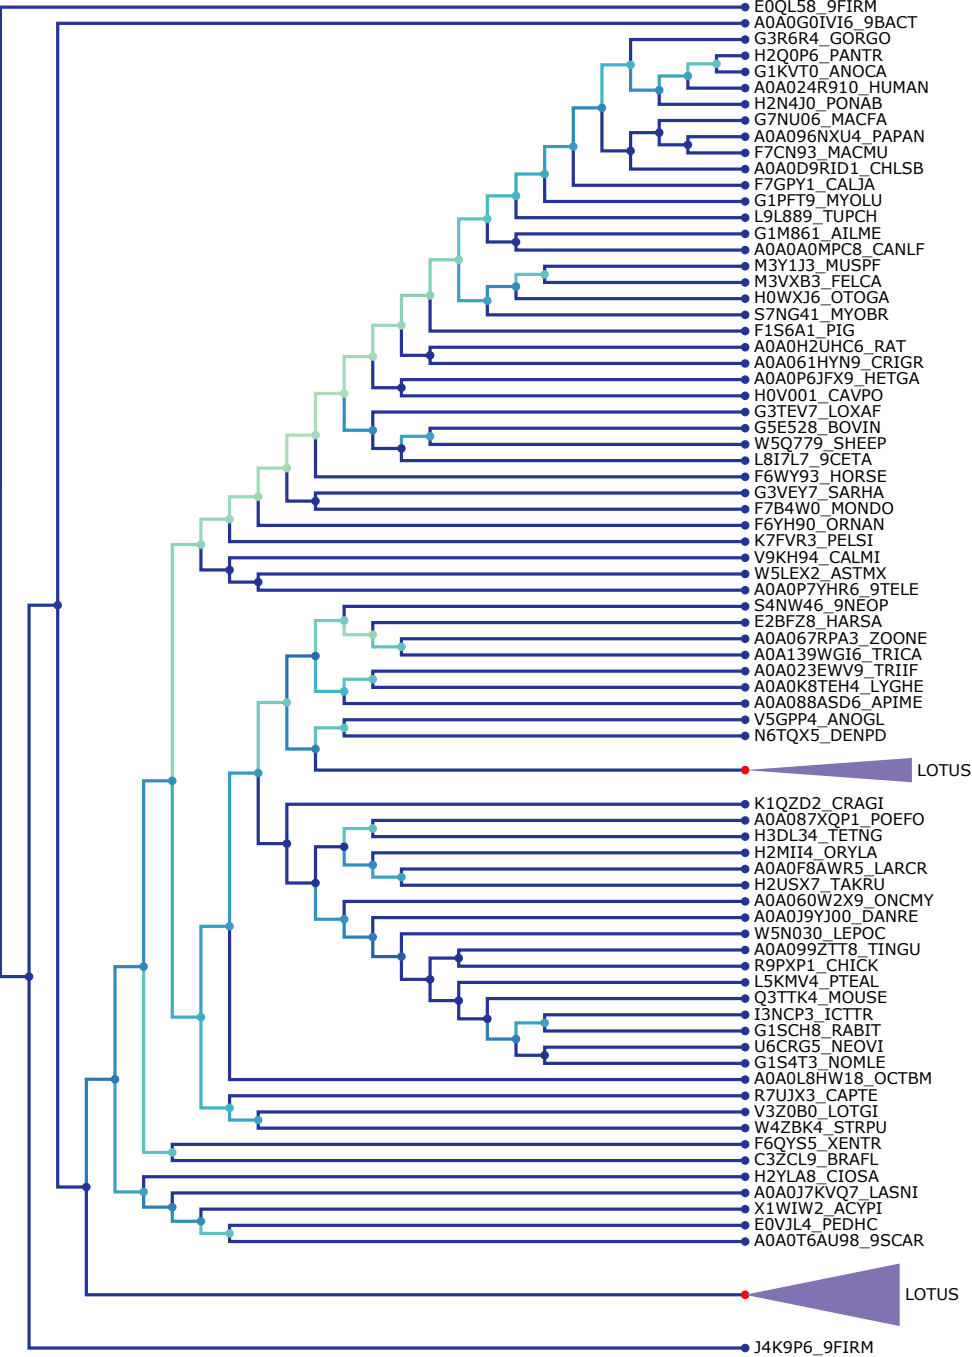

T COFFEE tree

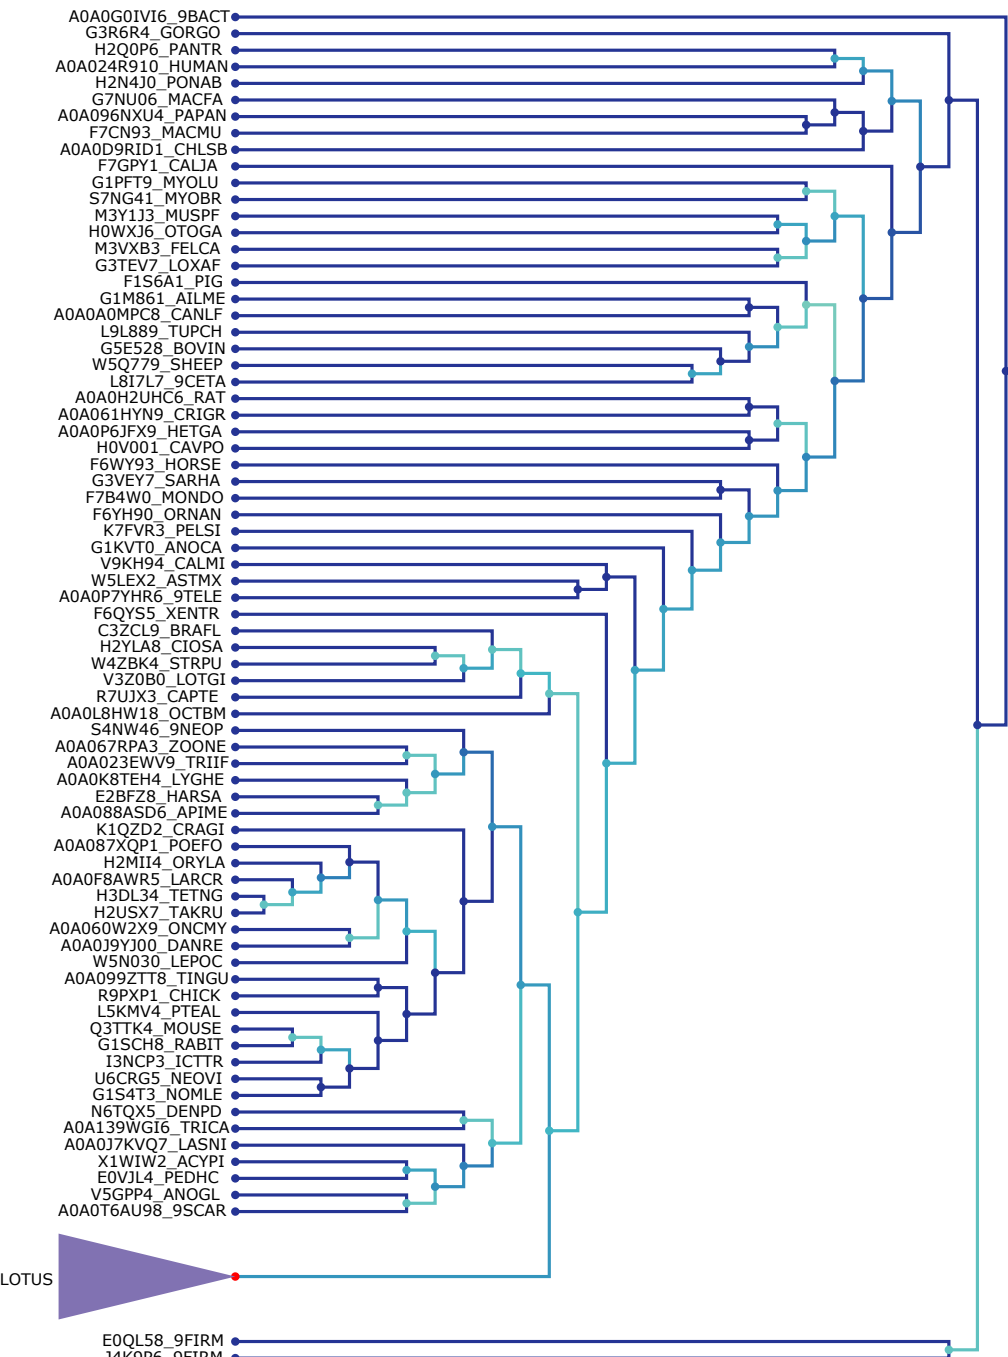

Supplement: supp [file elife_poa_e45539_Figure_2_figure_supplement_13.pdf › elife_poa_e45539_Figure_2_figure_supplement_13.pdf]

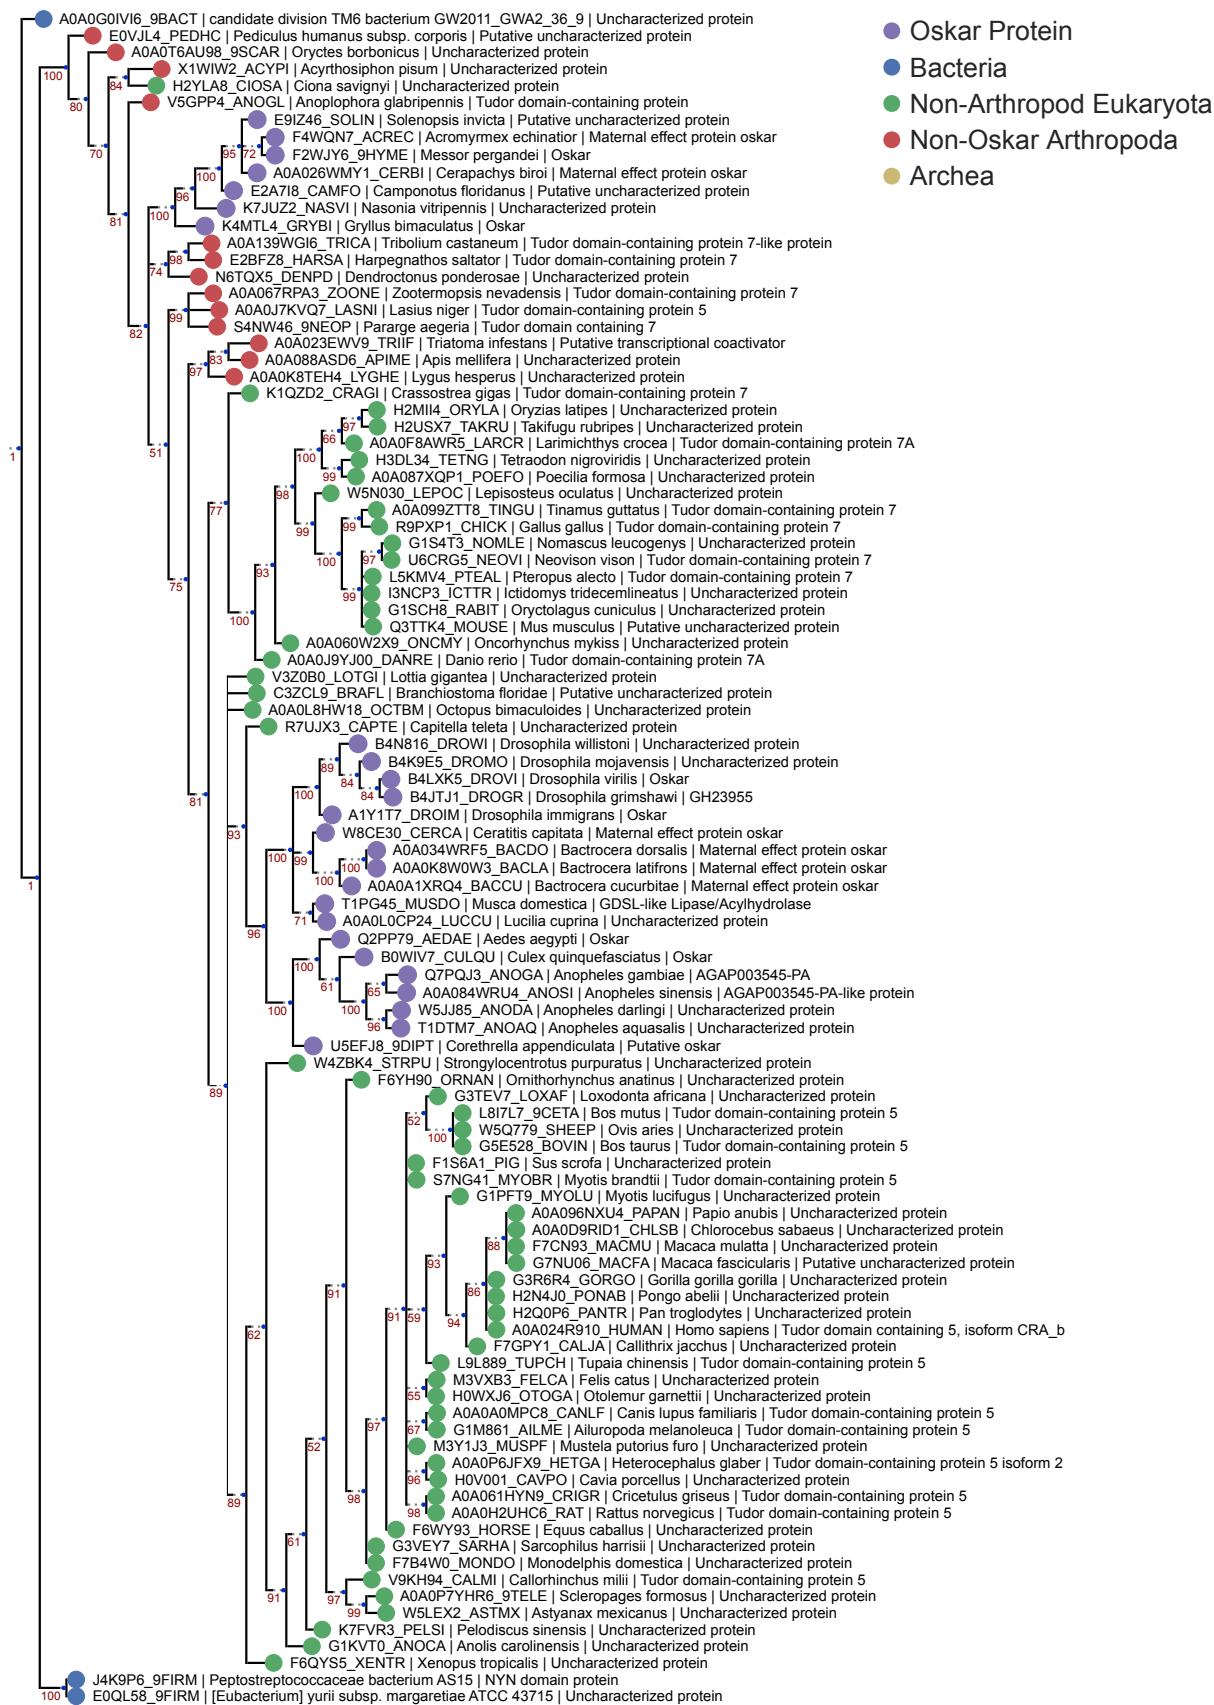

Supplement: supp [file elife_poa_e45539_Figure_2_figure_supplement_2.pdf › elife_poa_e45539_Figure_2_figure_supplement_2.pdf]

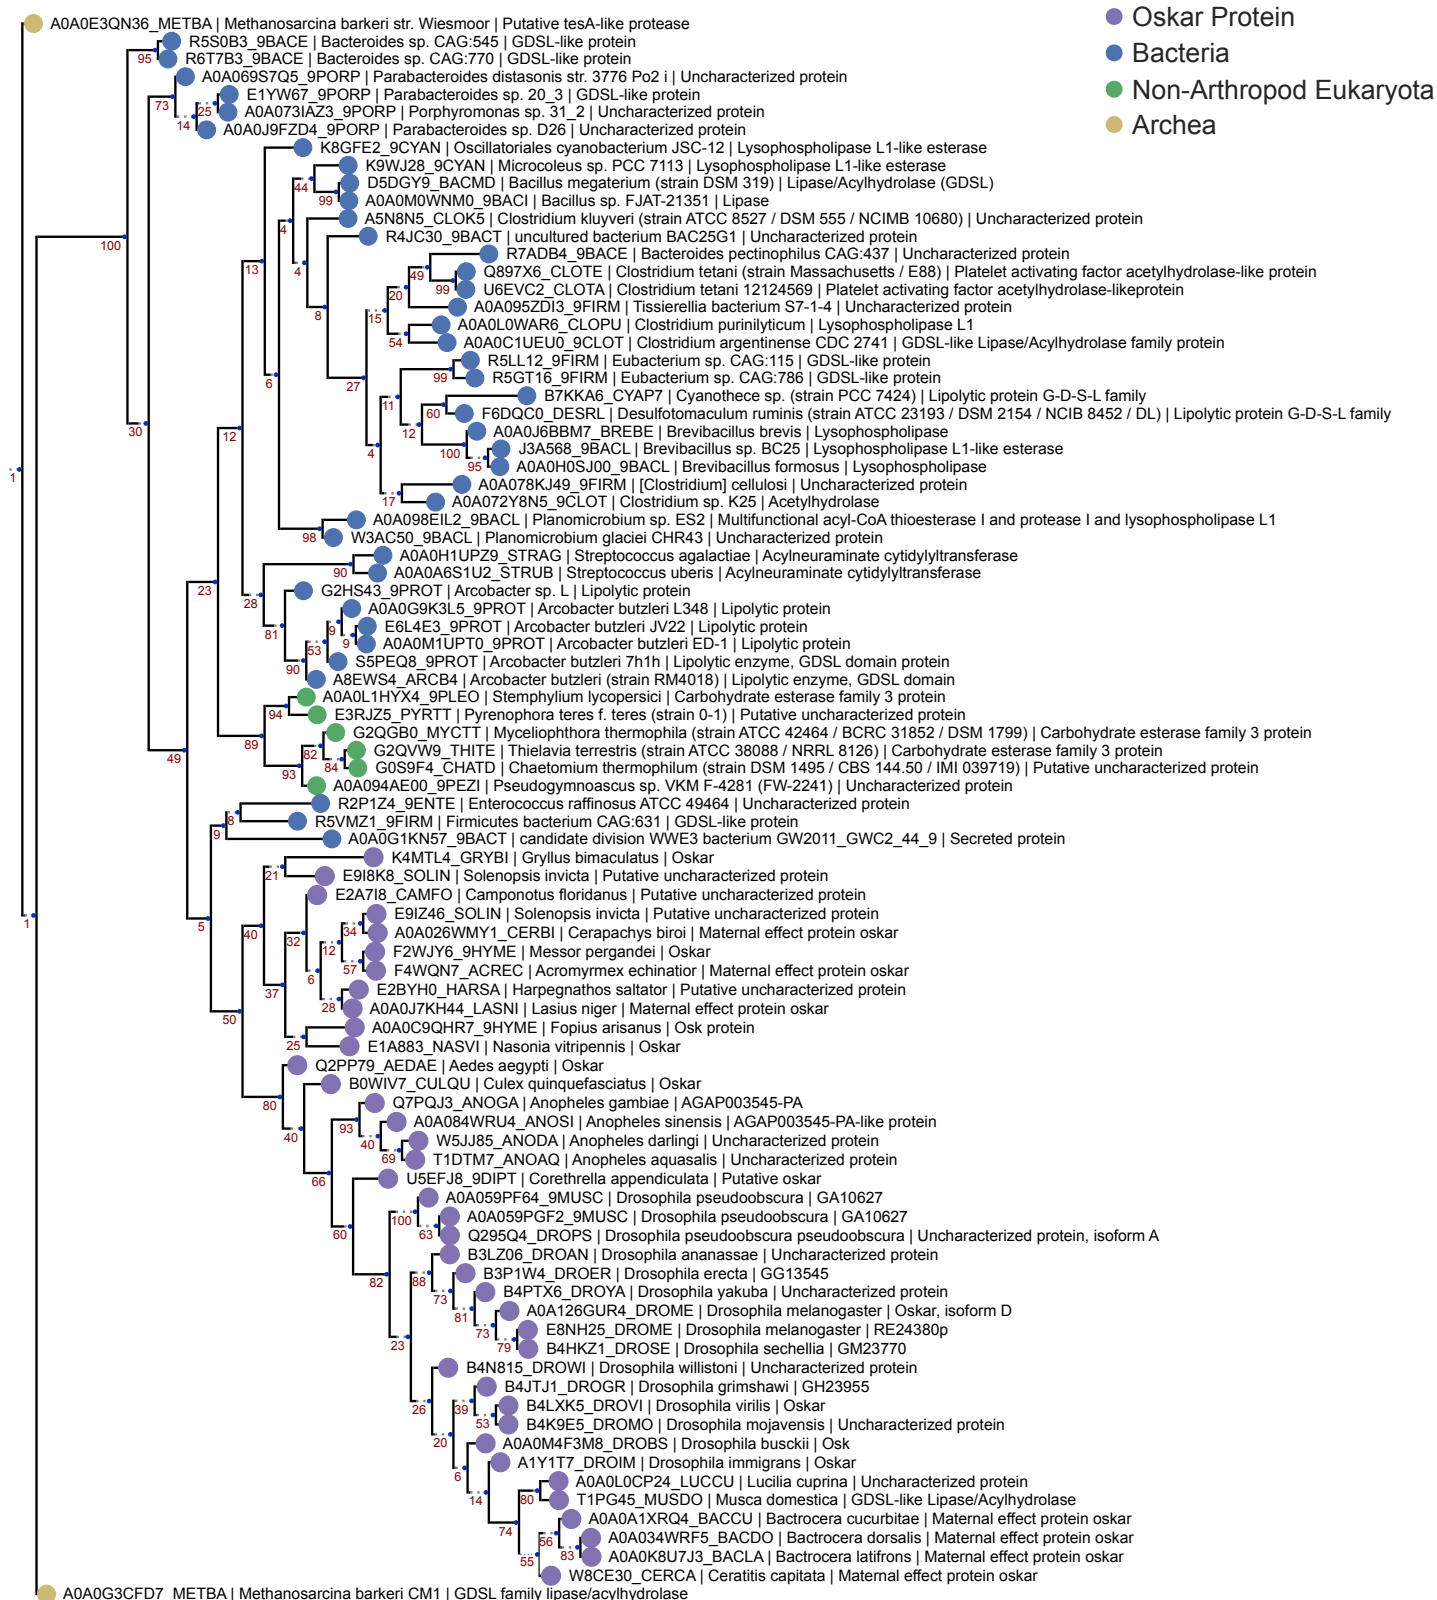

Supplement: supp [file elife_poa_e45539_Figure_2_figure_supplement_3.pdf › elife_poa_e45539_Figure_2_figure_supplement_3.pdf]

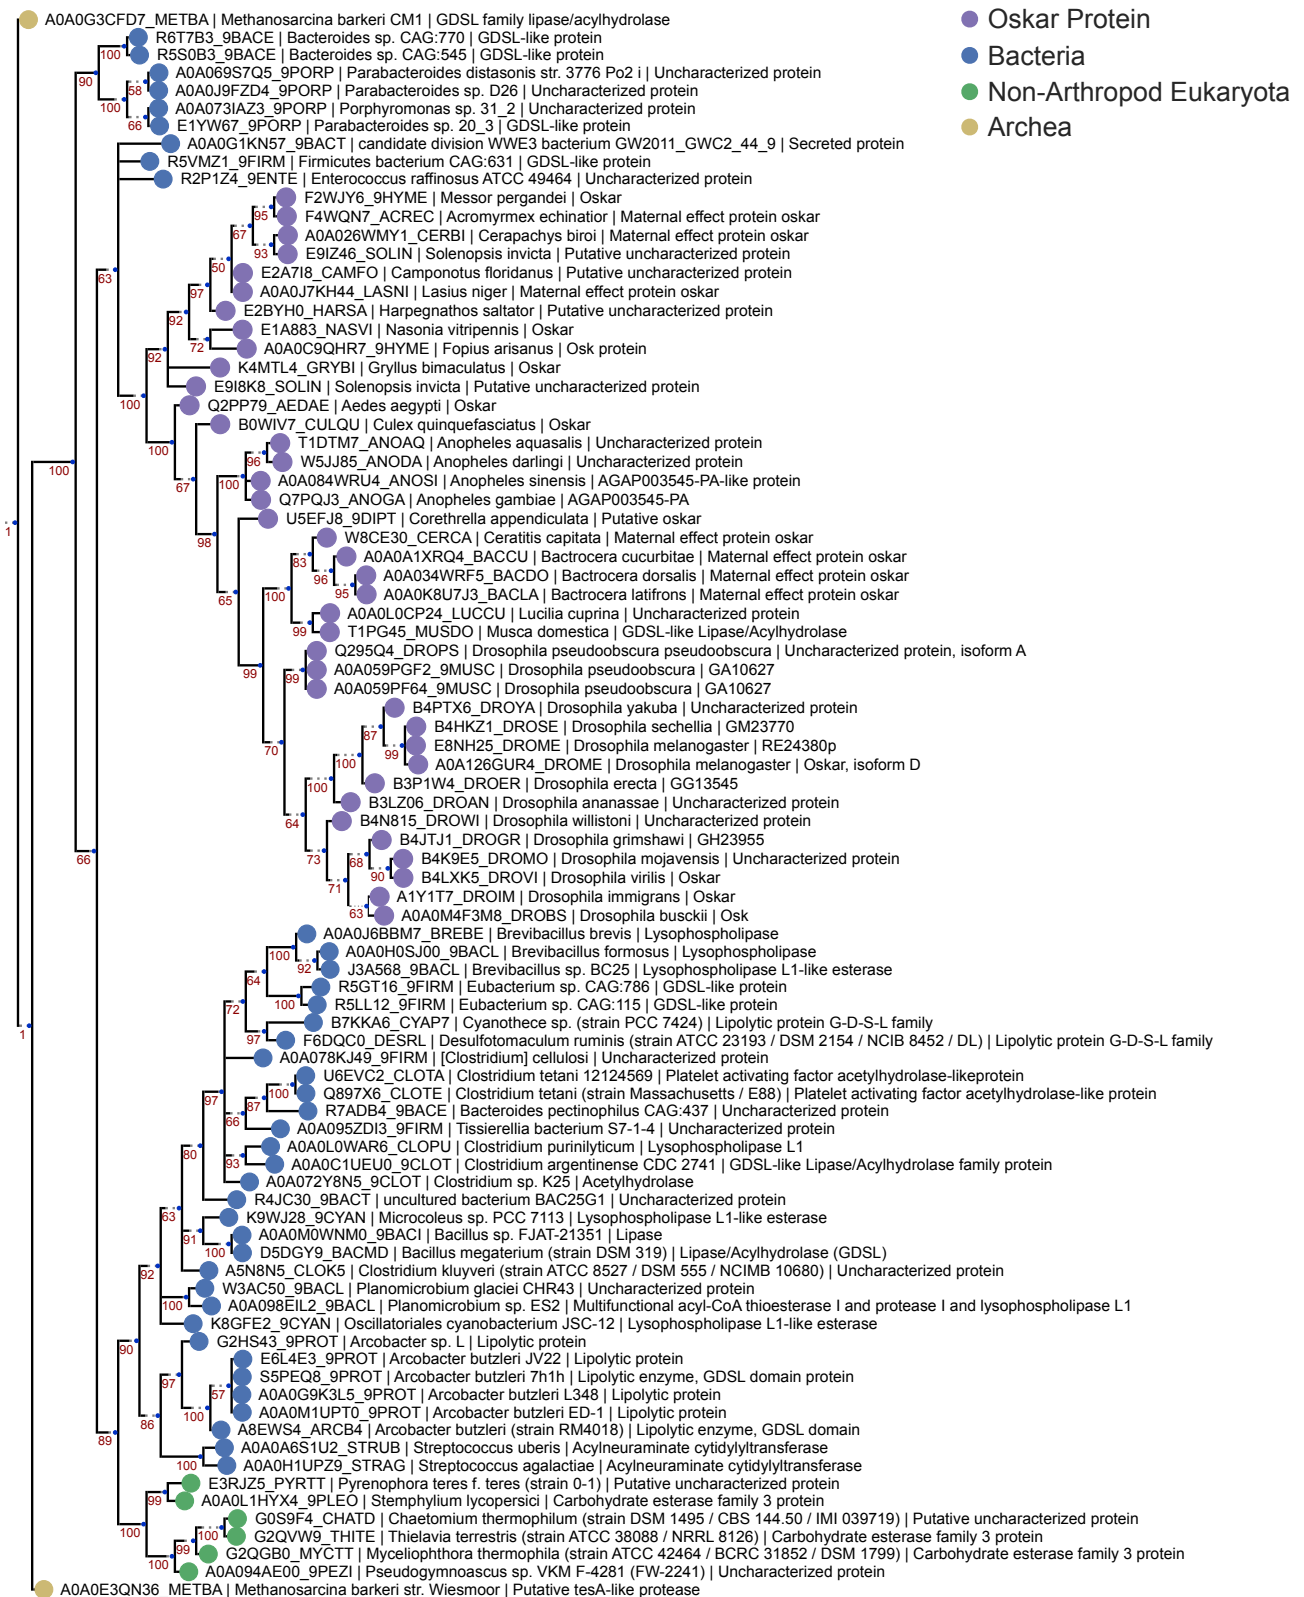

Supplement: supp [file elife_poa_e45539_Figure_2_figure_supplement_4.pdf › elife_poa_e45539_Figure_2_figure_supplement_4.pdf]

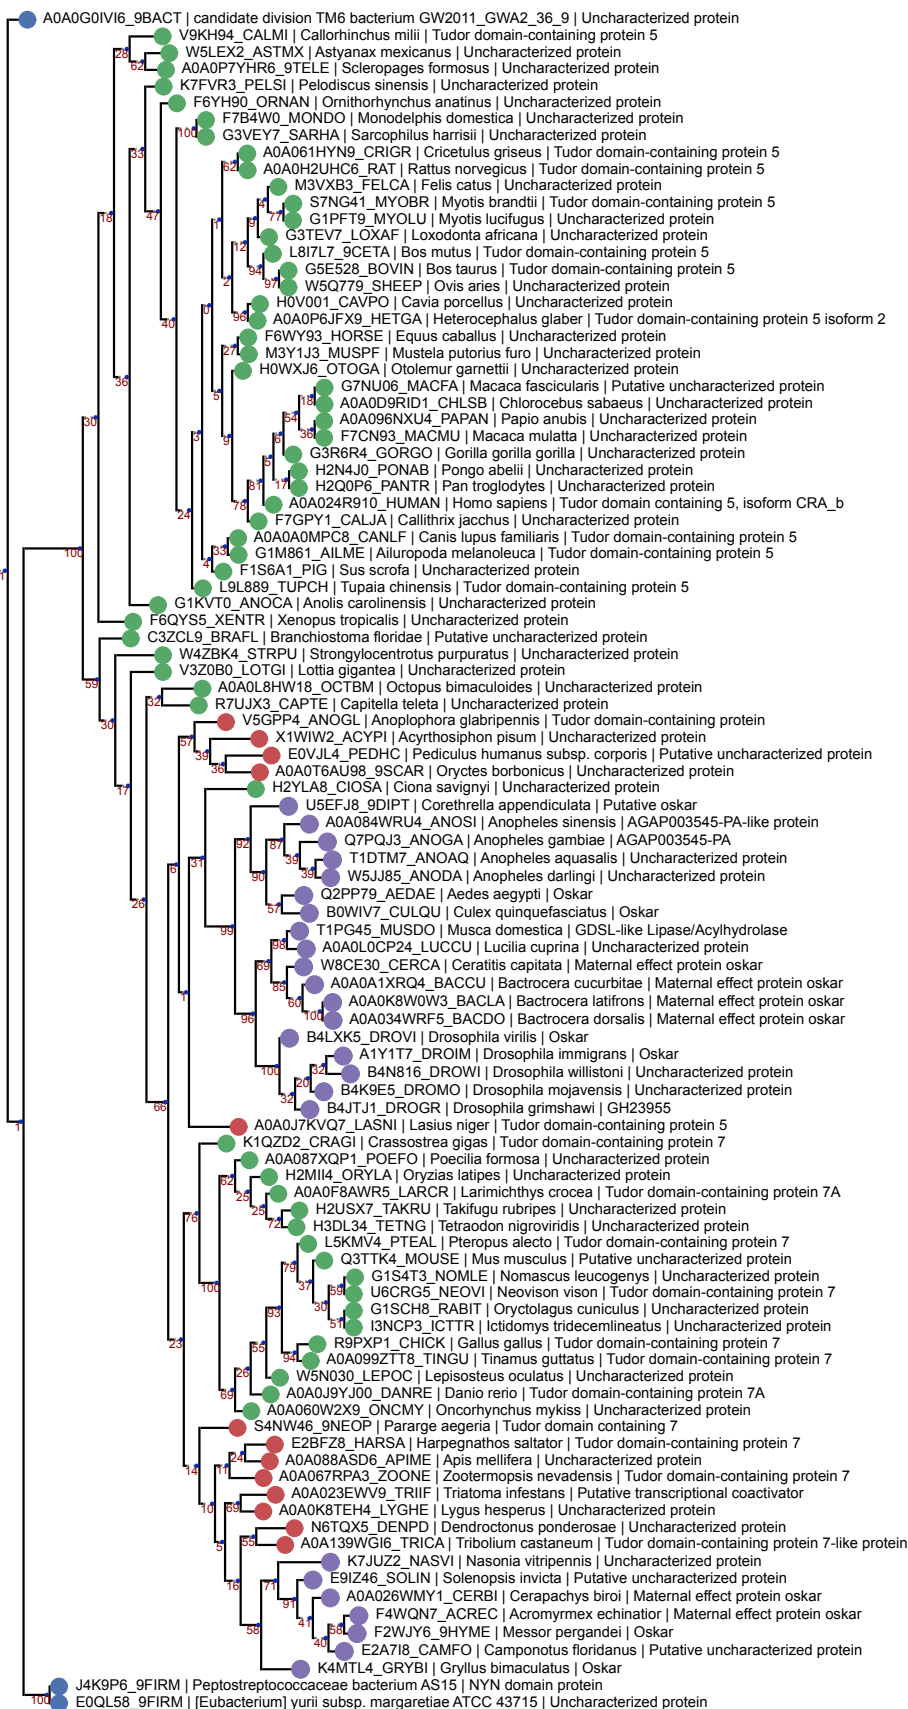

Supplement: supp [file elife_poa_e45539_Figure_2_figure_supplement_6.pdf › elife_poa_e45539_Figure_2_figure_supplement_6.pdf]

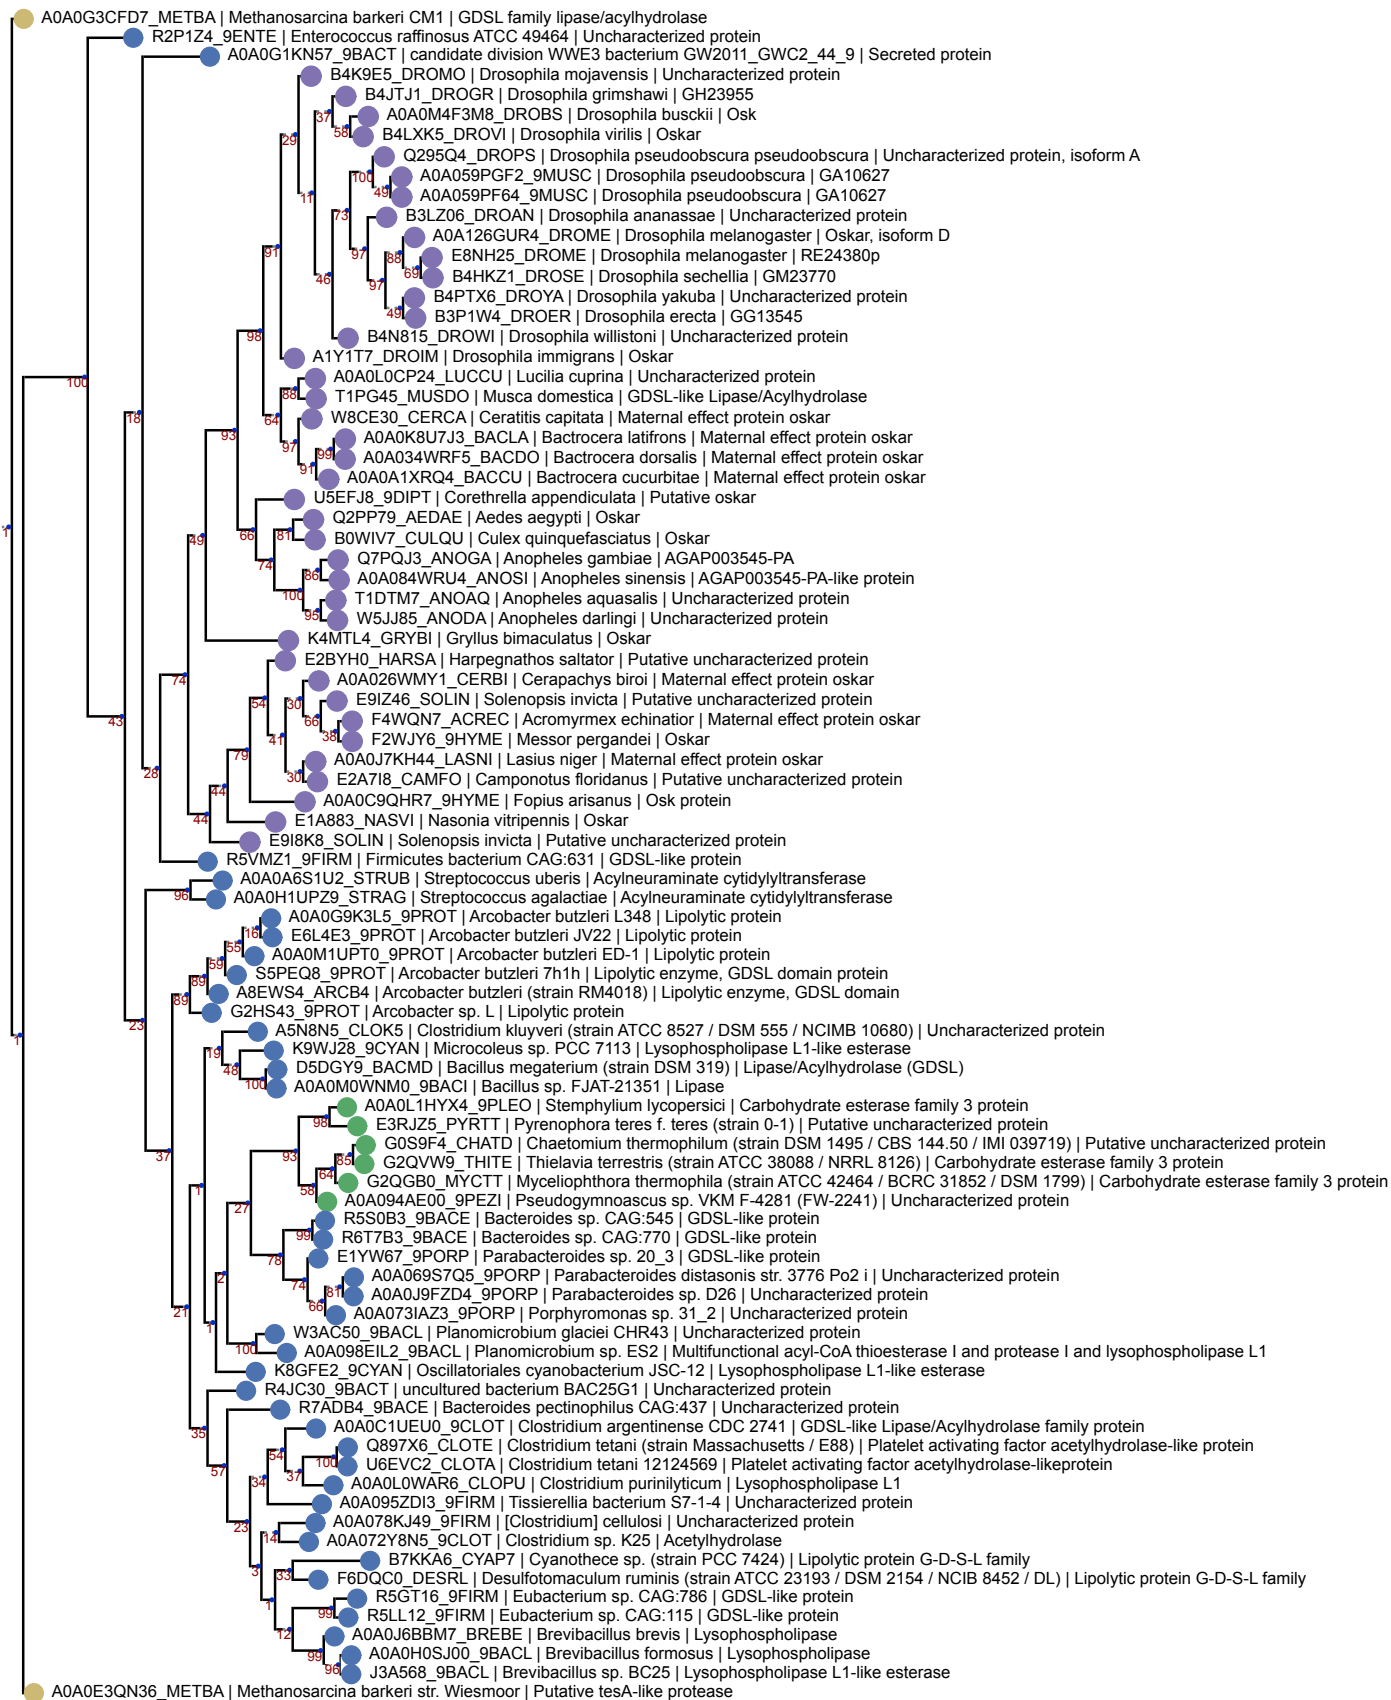

Supplement: supp [file elife_poa_e45539_Figure_2_figure_supplement_7.pdf › elife_poa_e45539_Figure_2_figure_supplement_7.pdf]

# MUSCLE tree

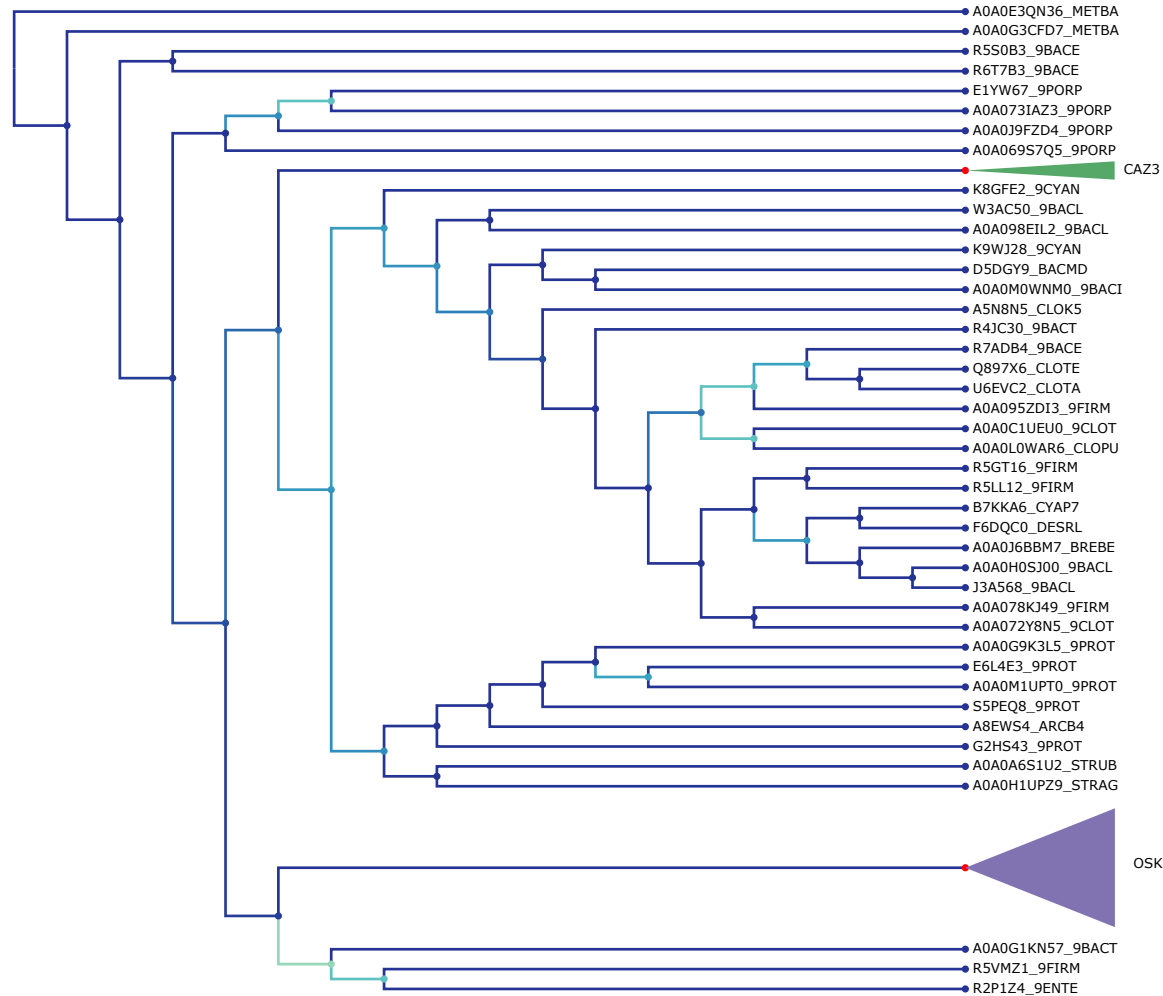

# PRANK tree

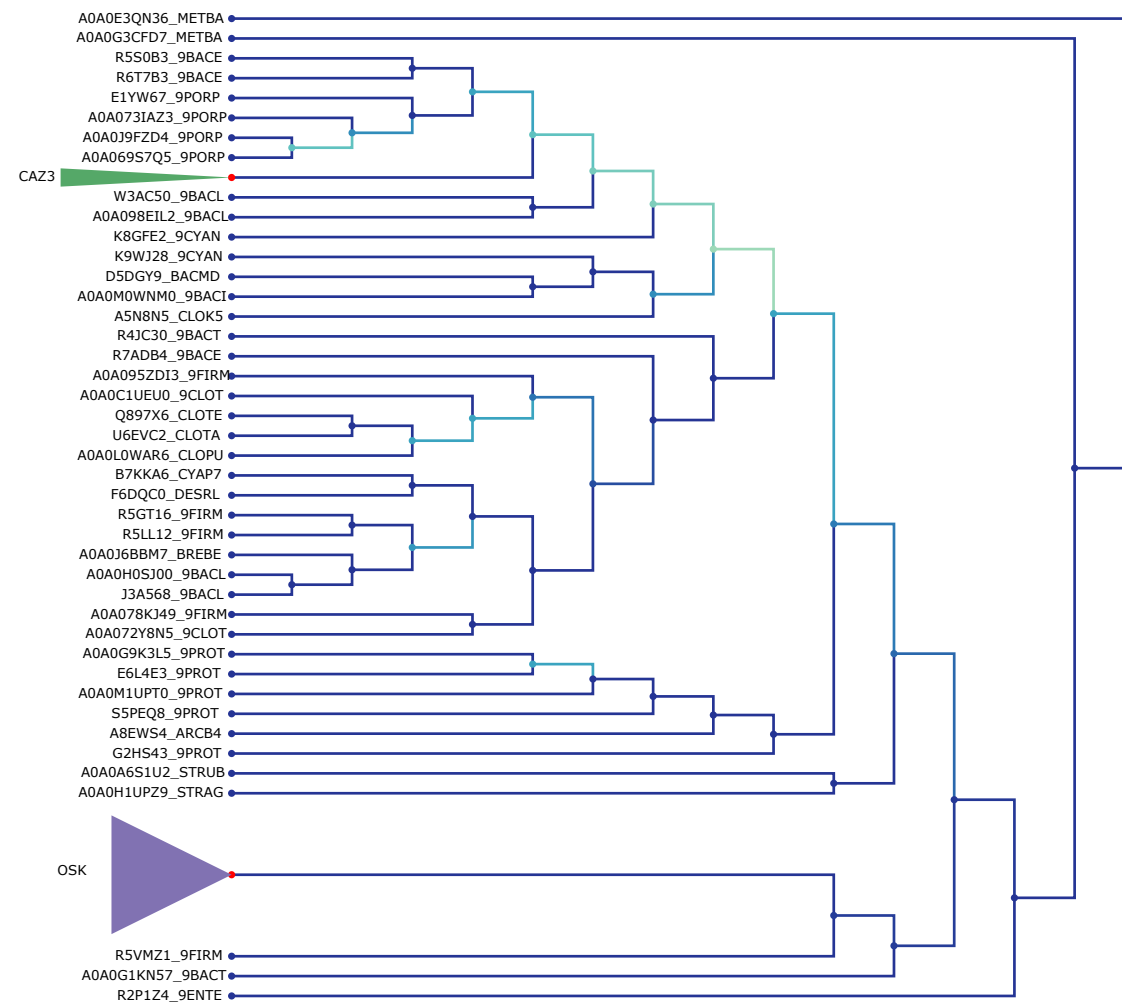

Supplement: supp [file elife_poa_e45539_Figure_2_figure_supplement_8.pdf › elife_poa_e45539_Figure_2_figure_supplement_8.pdf]

MUSCLE tree

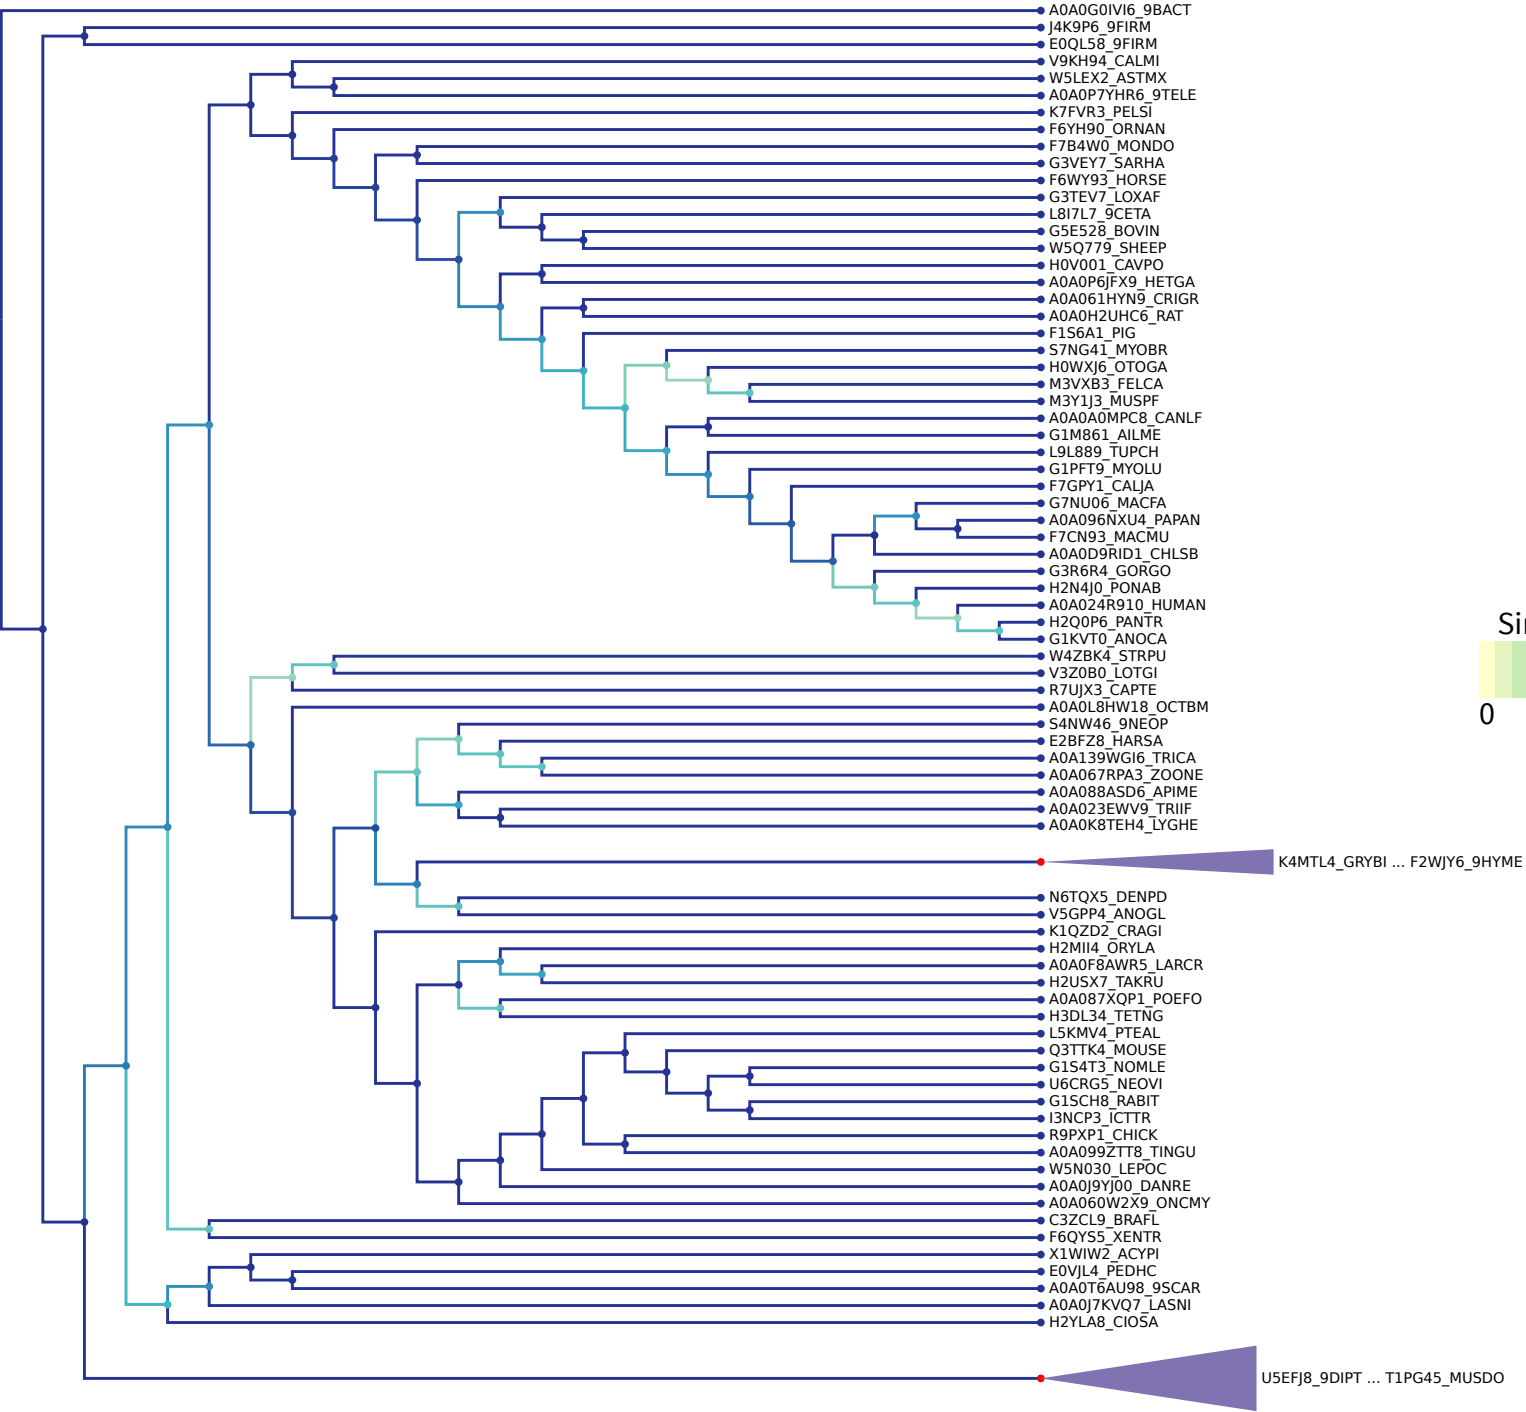

PRANK tree

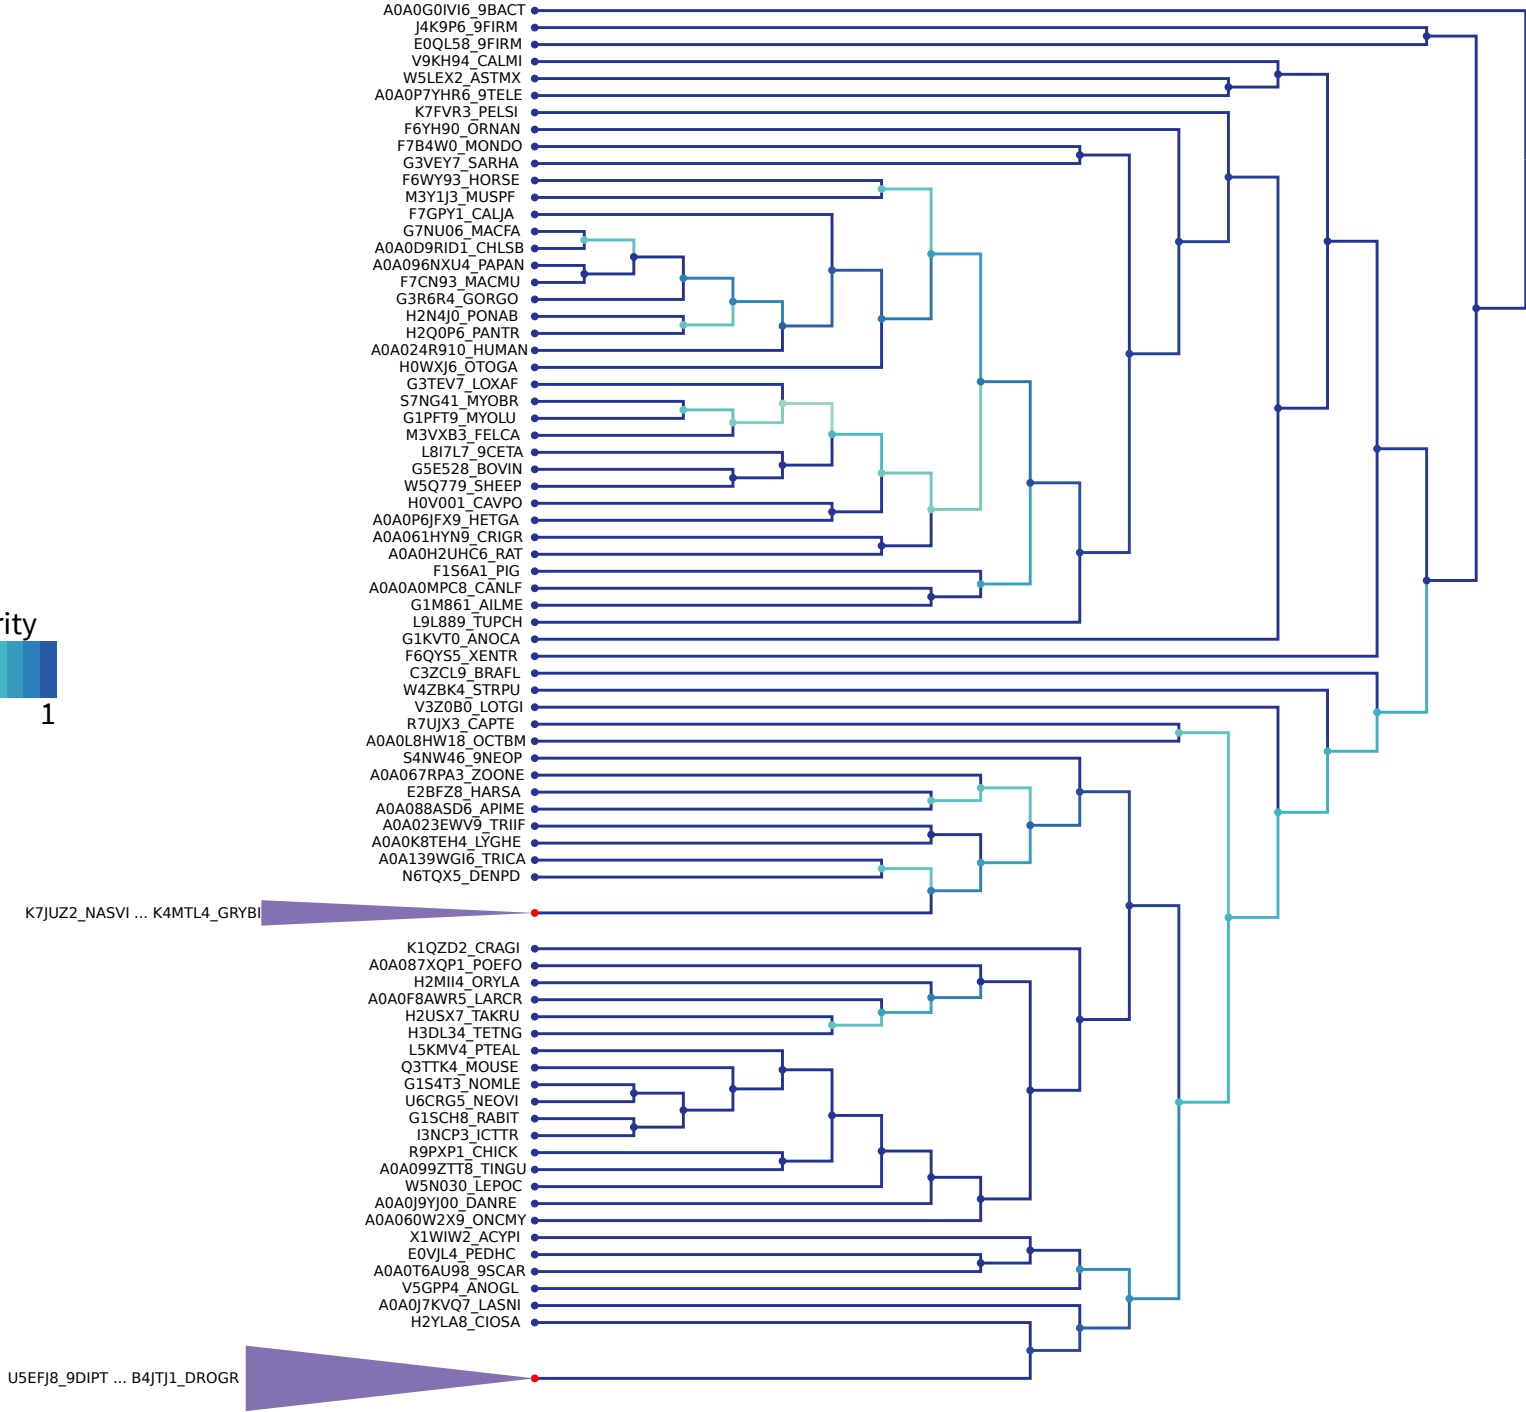

Supplement: supp [file elife_poa_e45539_Figure_2_figure_supplement_9.pdf › elife_poa_e45539_Figure_2_figure_supplement_9.pdf]
